# Supplementary material for: Comparative population genomics reveals convergent adaptation across independent origins of avian obligate brood parasitism
Source: Research Square preprint supplement (doi:10.21203/rs.3.rs-6430164/v1), 2025-05-26
Supplement: Supplementary file 1 [file 3b8390eefa5f874e6fb672c8.xlsx]

## Sheet: 1 Data summary
Supplementary Table 1: Overview of the species, assemblies, annotations, and resequencing data used in the analysis
							number of resequenced individuals
	Parasite/Outgroup	Common name	Scientific name	Genome accession	Genome annotation accession	Population resequencing accession	before filtering	after filtering	Mil. SNPs	Estimated diversity, %	Mean depth
Clade 1 - finches	host-specific parasite	cuckoo finch	Anomalospiza imberbis	GCA_031753505.1	GCF_031753505.1	this project	20	20	18.2	0.4	14.5
	host-specific parasite	Cameroon indigobird	Vidua camerunensis	not used	not used	this project	19	19	11.2	0.3	26.6
	host-specific parasite	village indigobird	Vidua chalybeata	GCA_026979565.1	GCF_026979565.1	not used	—	—	—	—	—
	host-specific parasite	pin-tailed whydah	Vidua macroura	GCA_024509145.1	GCF_024509145.1	this project	17	16	11.8	0.3	12.8
	parental outgroup	long-tailed finch	Poephila acuticauda	PRJEB10586	JBBXKG000000000	ERR1013135-54	20	16	37.9	0.9	20.7
	parental outgroup	zebra finch	Taeniopygia guttata	GCA_003957565.4	not used	ERR1013161-79	19	19	67.6	1.9	23.3
	parental outgroup	black-necked weaver	Ploceus nigricollis	GCA_013399945.1	not used	not used	—	—	—	—	—
Clade 2 - honeyguide	host-specific parasite	greater honeyguide	Indicator indicator	GCA_027791375.2	GCF_027791375.1	this project	31	31	12.8	0.3	13.5
	parental outgroup	downy woodpecker	Dryobates pubescens	GCA_014839835.1	GCF_014839835.1	this project	10	10	22.7	0.7	18
	parental outgroup	golden-fronted woodpecker	Melanerpes aurifrons	GCA_011125475.1	not used	not used	—	—	—	—	—
Clade 3: cowbird	generalist parasite	brown-headed cowbird	Molothrus ater	GCA_012460135.3	GCF_012460135.2	this project	10	10	20.6	0.7	18
	parental outgroup	red-winged blackbird	Agelaius phoeniceus	GCA_020745825.3	GCF_020745825.1	this project	10	10	38.4	1.2	19.4
	parental outgroup	tricolored blackbird	Agelaius tricolor	GCA_023055355.1	not used	not used	—	—	—	—	—
additional species	parental outgroup	peregrine falcon	Falco peregrinus	GCA_000337955.1	GCF_000337955.1	PRJNA686418	16	16	5.96	0.2	38.5
	generalist parasite	black-headed duck	Heteronetta atricapilla	GCA_011075105.1	not used	this project	14	14	56.4	1.6	—

## Sheet: 2 Resequencing samples
Supplementary Table 2: Detailed description of the resequenced samples used in the study
Species	Sample	sex	paired reads	read-length	~depth	included in main analyses	number of filtered SNPs	SNP density, per kb	SRA	origin	reference	collector
Anomalospiza imberbis	CF0720A	M	55545124	150	13.9	yes	5404451	4.5	TBD	Choma, Zambia	Sorenson et al., in prep.	Claire et al.
Anomalospiza imberbis	2013ERY045A2	F	92524970	151	23.3	yes	5444077	4.5	TBD	Choma, Zambia	Sorenson et al., in prep.	Claire et al.
Anomalospiza imberbis	CF0724A	F	64409617	151	16.2	yes	5320928	4.4	TBD	Choma, Zambia	Sorenson et al., in prep.	Claire et al.
Anomalospiza imberbis	CF0802B	F	64068400	150	16	yes	5462858	4.6	TBD	Choma, Zambia	Sorenson et al., in prep.	Claire et al.
Anomalospiza imberbis	2012JUN005A1	F	101711206	151	25.6	yes	5387408	4.5	TBD	Choma, Zambia	Sorenson et al., in prep.	Claire et al.
Anomalospiza imberbis	2012JUN006	F	68118314	151	17.1	yes	5391410	4.5	TBD	Choma, Zambia	Sorenson et al., in prep.	Claire et al.
Anomalospiza imberbis	2012JUN006A1	F	60665646	150	15.2	yes	5434652	4.5	TBD	Choma, Zambia	Sorenson et al., in prep.	Claire et al.
Anomalospiza imberbis	2014JUN21A1	F	91625083	151	23.1	yes	5441305	4.5	TBD	Choma, Zambia	Sorenson et al., in prep.	Claire et al.
Anomalospiza imberbis	2014JUN22A1	F	62162544	151	15.6	yes	5377505	4.5	TBD	Choma, Zambia	Sorenson et al., in prep.	Claire et al.
Anomalospiza imberbis	2014JUN7A3	M	72574038	151	18.3	yes	5366727	4.5	TBD	Choma, Zambia	Sorenson et al., in prep.	Claire et al.
Anomalospiza imberbis	2012PS093A2	F	71026856	151	17.9	yes	5422845	4.5	TBD	Choma, Zambia	Sorenson et al., in prep.	Claire et al.
Anomalospiza imberbis	2012PS134A2	F	82031180	151	20.6	yes	5460509	4.6	TBD	Choma, Zambia	Sorenson et al., in prep.	Claire et al.
Anomalospiza imberbis	2013_PS179	F	62871694	150	15.7	yes	5533361	4.6	TBD	Choma, Zambia	Sorenson et al., in prep.	Claire et al.
Anomalospiza imberbis	2014PS058A1	F	75735767	151	19.1	yes	5340148	4.5	TBD	Choma, Zambia	Sorenson et al., in prep.	Claire et al.
Anomalospiza imberbis	CF0715B	M	83812781	151	21.1	yes	5472063	4.6	TBD	Choma, Zambia	Sorenson et al., in prep.	Claire et al.
Anomalospiza imberbis	2012PS024A1	F	73606086	151	18.5	yes	5362942	4.5	TBD	Choma, Zambia	Sorenson et al., in prep.	Claire et al.
Anomalospiza imberbis	2012PS129	F	161441523	151	40.6	yes	5510665	4.6	TBD	Choma, Zambia	Sorenson et al., in prep.	Claire et al.
Anomalospiza imberbis	2013_PS171A1	F	52948044	150	13.2	yes	5493716	4.6	TBD	Choma, Zambia	Sorenson et al., in prep.	Claire et al.
Anomalospiza imberbis	2013PS082A1	F	95373861	151	24	yes	5508846	4.6	TBD	Choma, Zambia	Sorenson et al., in prep.	Claire et al.
Anomalospiza imberbis	2014PS008A1	M	77066373	151	19.4	yes	5428476	4.5	TBD	Choma, Zambia	Sorenson et al., in prep.	Claire et al.
Vidua camerunensis	CNB020	F	133912533	151	33.7	yes	3284238	3	TBD	Tibati, Cameroon	Sorenson et al., in prep.	CNB & MDS
Vidua camerunensis	CNB104	F	97347783	151	24.5	yes	3199148	3	TBD	Tibati, Cameroon	Sorenson et al., in prep.	CNB & MDS
Vidua camerunensis	CNB106	F	98205667	151	24.7	yes	3349072	3.1	TBD	Tibati, Cameroon	Sorenson et al., in prep.	CNB & MDS
Vidua camerunensis	CNB107	F	140196356	151	35.3	yes	3331168	3.1	TBD	Tibati, Cameroon	Sorenson et al., in prep.	CNB & MDS
Vidua camerunensis	CNB167	F	82761436	151	20.8	yes	3272217	3	TBD	Tibati, Cameroon	Sorenson et al., in prep.	CNB & MDS
Vidua camerunensis	CNB183	F	140441513	151	35.3	yes	3948568	3.7	TBD	Tibati, Cameroon	Sorenson et al., in prep.	CNB & MDS
Vidua camerunensis	CNB184	F	114400711	151	28.8	yes	3283395	3	TBD	Tibati, Cameroon	Sorenson et al., in prep.	CNB & MDS
Vidua camerunensis	CNB188	F	87463718	151	22	yes	3324235	3.1	TBD	Tibati, Cameroon	Sorenson et al., in prep.	CNB & MDS
Vidua camerunensis	CNB217	F	143363862	151	36.1	yes	3997092	3.7	TBD	Tibati, Cameroon	Sorenson et al., in prep.	CNB & MDS
Vidua camerunensis	CNB298	F	140321234	151	35.3	yes	3339724	3.1	TBD	Tibati, Cameroon	Sorenson et al., in prep.	CNB & MDS
Vidua camerunensis	CNB303	F	197473212	151	49.7	yes	3285953	3	TBD	Tibati, Cameroon	Sorenson et al., in prep.	CNB & MDS
Vidua camerunensis	CNB373	F	201810818	151	50.8	yes	3300676	3.1	TBD	Tibati, Cameroon	Sorenson et al., in prep.	CNB & MDS
Vidua camerunensis	CNB395	F	163764568	151	41.2	yes	3287461	3	TBD	Tibati, Cameroon	Sorenson et al., in prep.	CNB & MDS
Vidua camerunensis	CNB408	F	160559684	151	40.4	yes	4028175	3.7	TBD	Tibati, Cameroon	Sorenson et al., in prep.	CNB & MDS
Vidua camerunensis	CNB474	F	110776969	151	27.9	yes	3299502	3.1	TBD	Tibati, Cameroon	Sorenson et al., in prep.	CNB & MDS
Vidua camerunensis	MDS001	M	147277869	151	37.1	yes	3323282	3.1	TBD	Tibati, Cameroon	Sorenson et al., in prep.	CNB & MDS
Vidua camerunensis	MDS006	M	105247096	151	26.5	yes	3327240	3.1	TBD	Tibati, Cameroon	Sorenson et al., in prep.	CNB & MDS
Vidua camerunensis	MDS008	M	181796526	151	45.8	yes	3337866	3.1	TBD	Tibati, Cameroon	Sorenson et al., in prep.	CNB & MDS
Vidua camerunensis	MDS009	M	135214625	151	34	yes	4080295	3.8	TBD	Tibati, Cameroon	Sorenson et al., in prep.	CNB & MDS
Vidua macroura	VmacP02	F	62219662	150	15.6	no			TBD	KwaZulu_Natal, S. Africa	Sorenson et al., in prep.	Justin Schuetz
Vidua macroura	P15_BT-22_RH	F	64975565	150	16.2	yes	4162175	3.7	TBD	KwaZulu_Natal, S. Africa	Sorenson et al., in prep.	Justin Schuetz
Vidua macroura	P17_LM-35_LH	M	62972782	150	15.7	yes	4146522	3.7	TBD	KwaZulu_Natal, S. Africa	Sorenson et al., in prep.	Justin Schuetz
Vidua macroura	P26_LM-38_UN	F	59313595	150	14.8	yes	4186130	3.7	TBD	KwaZulu_Natal, S. Africa	Sorenson et al., in prep.	Justin Schuetz
Vidua macroura	P27_LM-05_UN	F	62484933	150	15.6	yes	4215925	3.8	TBD	KwaZulu_Natal, S. Africa	Sorenson et al., in prep.	Justin Schuetz
Vidua macroura	P28_LM-53_UN	F	69629115	150	17.4	yes	4157693	3.7	TBD	KwaZulu_Natal, S. Africa	Sorenson et al., in prep.	Justin Schuetz
Vidua macroura	P34_LM-40_egg-7	M	73841005	150	18.5	yes	4121827	3.7	TBD	KwaZulu_Natal, S. Africa	Sorenson et al., in prep.	Justin Schuetz
Vidua macroura	P37_LM-40_R2	F	61250597	150	15.3	yes	4154526	3.7	TBD	KwaZulu_Natal, S. Africa	Sorenson et al., in prep.	Justin Schuetz
Vidua macroura	P41_LM-32_egg-7	M	70294141	150	17.6	yes	4132809	3.7	TBD	KwaZulu_Natal, S. Africa	Sorenson et al., in prep.	Justin Schuetz
Vidua macroura	P44_JS-42_egg-7	F	67351418	150	16.8	yes	4163937	3.7	TBD	KwaZulu_Natal, S. Africa	Sorenson et al., in prep.	Justin Schuetz
Vidua macroura	P52_JS-55_egg-7	F	65013457	150	16.3	yes	4163553	3.7	TBD	KwaZulu_Natal, S. Africa	Sorenson et al., in prep.	Justin Schuetz
Vidua macroura	P63_LM-41_egg-2	M	65670608	150	16.4	yes	4038751	3.6	TBD	KwaZulu_Natal, S. Africa	Sorenson et al., in prep.	Justin Schuetz
Vidua macroura	P73_LM-41_egg-1	F	67332147	150	16.8	yes	4688688	4.2	TBD	KwaZulu_Natal, S. Africa	Sorenson et al., in prep.	Justin Schuetz
Vidua macroura	P76_LM-16_egg-4	M	59585210	150	14.9	yes	4075682	3.6	TBD	KwaZulu_Natal, S. Africa	Sorenson et al., in prep.	Justin Schuetz
Vidua macroura	P77_LM-01_UN	F	63054342	150	15.8	yes	4158834	3.7	TBD	KwaZulu_Natal, S. Africa	Sorenson et al., in prep.	Justin Schuetz
Vidua macroura	P80_JS-55_RH	F	63766019	150	15.9	yes	4174109	3.7	TBD	KwaZulu_Natal, S. Africa	Sorenson et al., in prep.	Justin Schuetz
Poephila a. acuticauda	ERR1013135	F	168385348	100	28.1	no			ERR1013135	Western Australia	Singhal et al. 2015
Poephila a. acuticauda	ERR1013136	M	213111226	100	35.5	yes	9656467	7.6	ERR1013136	Western Australia	Singhal et al. 2015
Poephila a. acuticauda	ERR1013137	F	321251670	100	53.5	no			ERR1013137	Western Australia	Singhal et al. 2015
Poephila a. acuticauda	ERR1013138	M	157504704	100	26.3	yes	9600648	7.6	ERR1013138	Western Australia	Singhal et al. 2015
Poephila a. acuticauda	ERR1013139	M	119402751	100	19.9	yes	9523134	7.5	ERR1013139	Western Australia	Singhal et al. 2015
Poephila a. acuticauda	ERR1013140	M	133255314	100	22.2	yes	9563910	7.5	ERR1013140	Western Australia	Singhal et al. 2015
Poephila a. acuticauda	ERR1013141	M	120158712	100	20	yes	10326230	8.1	ERR1013141	Western Australia	Singhal et al. 2015
Poephila a. acuticauda	ERR1013142	M	218693716	100	36.4	yes	9627813	7.6	ERR1013142	Western Australia	Singhal et al. 2015
Poephila a. acuticauda	ERR1013143	M	126733308	100	21.1	yes	9557397	7.5	ERR1013143	Western Australia	Singhal et al. 2015
Poephila a. acuticauda	ERR1013144	F	186923020	100	31.2	yes	9651812	7.6	ERR1013144	captive (Western Australia)	Singhal et al. 2015
Poephila a. hecki	ERR1013145	M	200302878	100	33.4	no			ERR1013145	Queensland, Australia	Singhal et al. 2015
Poephila a. hecki	ERR1013146	F	272074258	100	45.3	yes	9500750	7.5	ERR1013146	Queensland, Australia	Singhal et al. 2015
Poephila a. hecki	ERR1013147	F	177617218	100	29.6	yes	9488461	7.5	ERR1013147	Queensland, Australia	Singhal et al. 2015
Poephila a. hecki	ERR1013148	F	126898806	100	21.1	yes	8125105	6.4	ERR1013148	Queensland, Australia	Singhal et al. 2015
Poephila a. hecki	ERR1013149	F	208721867	100	34.8	yes	9545700	7.5	ERR1013149	Queensland, Australia	Singhal et al. 2015
Poephila a. hecki	ERR1013150	M	132832825	100	22.1	no			ERR1013150	Queensland, Australia	Singhal et al. 2015
Poephila a. hecki	ERR1013151	M	178104906	100	29.7	yes	9545999	7.5	ERR1013151	Queensland, Australia	Singhal et al. 2015
Poephila a. hecki	ERR1013152	M	106976872	100	17.8	yes	9370838	7.4	ERR1013152	Queensland, Australia	Singhal et al. 2015
Poephila a. hecki	ERR1013153	F	142618781	100	23.8	yes	9489954	7.5	ERR1013153	Queensland, Australia	Singhal et al. 2015
Poephila a. hecki	ERR1013154	M	135317661	100	22.6	yes	9444124	7.4	ERR1013154	Queensland, Australia	Singhal et al. 2015
Agelaius phoeniceus	647076_S50	F	101765274	151	25.6	yes	11586174	9.7	TBD	McHenry Co.,North Dakota	Sorenson et al., in prep.	AMNH
Agelaius phoeniceus	647077_S51	F	102356258	151	25.8	yes	11583475	9.7	TBD	McHenry Co.,North Dakota	Sorenson et al., in prep.	AMNH
Agelaius phoeniceus	647108_S23	F	88295498	151	22.2	yes	11563600	9.7	TBD	Bottineau Co.,North Dakota	Sorenson et al., in prep.	AMNH
Agelaius phoeniceus	647109_S24	F	69280995	151	17.4	yes	11501719	9.7	TBD	Bottineau Co.,North Dakota	Sorenson et al., in prep.	AMNH
Agelaius phoeniceus	647110_S36	M	77413579	151	19.5	yes	11729294	9.9	TBD	Bottineau Co.,North Dakota	Sorenson et al., in prep.	AMNH
Agelaius phoeniceus	647619_S26	F	37487521	151	9.4	yes	11016343	9.3	TBD	Bottineau Co.,North Dakota	Sorenson et al., in prep.	AMNH
Agelaius phoeniceus	652559_S58	F	101498789	151	25.5	yes	11566766	9.7	TBD	Valley Co.,Montana	Sorenson et al., in prep.	AMNH
Agelaius phoeniceus	652568_S47	M	136733052	151	34.4	yes	11831973	10	TBD	Valley Co.,Montana	Sorenson et al., in prep.	AMNH
Agelaius phoeniceus	652592_S37	F	116181701	151	29.2	yes	11594829	9.8	TBD	Valley Co.,Montana	Sorenson et al., in prep.	AMNH
Agelaius phoeniceus	652593_S49	F	107299129	151	27	yes	11586121	9.7	TBD	Valley Co.,Montana	Sorenson et al., in prep.	AMNH
Molothrus ater	601445_S54	F	84811296	151	21.3	yes	6681068	6.1	TBD	Bath Co.,Virginia	Sorenson et al., in prep.	AMNH
Molothrus ater	602207_S16	F	80753396	151	20.3	yes	6651658	6.1	TBD	Prince George's Co.,Maryland	Sorenson et al., in prep.	AMNH
Molothrus ater	602240_S28	F	87845695	151	22.1	yes	6647787	6.1	TBD	Charles Co.,Maryland	Sorenson et al., in prep.	AMNH
Molothrus ater	602241_S29	F	80905229	151	20.4	yes	6649556	6.1	TBD	Charles Co.,Maryland	Sorenson et al., in prep.	AMNH
Molothrus ater	609468_S32	F	83125101	151	20.9	yes	6634826	6.1	TBD	Calvert Co.,Maryland	Sorenson et al., in prep.	AMNH
Molothrus ater	609755_S52	F	75450956	151	19	yes	6678520	6.1	TBD	Calvert Co.,Maryland	Sorenson et al., in prep.	AMNH
Molothrus ater	609756_S53	M	118195743	151	29.7	yes	6629195	6.1	TBD	Calvert Co.,Maryland	Sorenson et al., in prep.	AMNH
Molothrus ater	627827_S30	M	68997301	151	17.4	yes	6548951	6	TBD	Prince George's Co.,Maryland	Sorenson et al., in prep.	AMNH
Molothrus ater	601470_S55	M	76578545	151	19.3	yes	6579465	6.1	TBD	Augusta Co.,Virginia	Sorenson et al., in prep.	AMNH
Molothrus ater	650005_S31	F	79624161	151	20	yes	6646617	6.1	TBD	Prince George's Co.,Maryland	Sorenson et al., in prep.	AMNH
Dryobates pubescens	601435_S25	F	100850815	151	25.4	yes	7561382	6.4	TBD	Bath Co., Virginia	this study	AMNH
Dryobates pubescens	601512_S33	F	71466883	151	18	yes	7633077	6.4	TBD	Wise Co., Virginia	this study	AMNH
Dryobates pubescens	601603_S57	F	89289078	151	22.5	yes	7617125	6.4	TBD	Smyth Co., Virginia	this study	AMNH
Dryobates pubescens	602089_S9	F	102980953	151	25.9	yes	7628843	6.4	TBD	Prince George's Co., Maryland	this study	AMNH
Dryobates pubescens	636213_S10	F	91748378	151	23.1	yes	7568135	6.4	TBD	Dorchester Co., Maryland	this study	AMNH
Dryobates pubescens	636216_S11	F	89301234	151	22.5	yes	7593521	6.4	TBD	Wicomico Co., Maryland	this study	AMNH
Dryobates pubescens	641490_S15	M	136821616	151	34.4	yes	7793274	6.6	TBD	Alleghany Co., Virginia	this study	AMNH
Dryobates pubescens	651003_S12	F	101827877	151	25.6	yes	7631540	6.4	TBD	Dorchester Co., Maryland	this study	AMNH
Dryobates pubescens	652991_S13	F	89780325	151	22.6	yes	10066749	8.5	TBD	Dorchester Co., Maryland	this study	AMNH
Dryobates pubescens	653015_S38	M	91115315	151	22.9	yes	7865862	6.6	TBD	Dorchester Co., Maryland	this study	AMNH
Indicator indicator	BC30453	F	72120948	150	18	yes	3829899	3.3	TBD	Niassa, Mozambique	this study	Jess & Claire
Indicator indicator	BC30454	F	72107969	150	18	yes	3831866	3.3	TBD	Niassa, Mozambique	this study	Jess & Claire
Indicator indicator	CV68914	F	72038367	150	18	yes	3774857	3.3	TBD	Niassa, Mozambique	this study	Jess & Claire
Indicator indicator	CV68916	F	72087474	150	18	yes	4164769	3.6	TBD	Niassa, Mozambique	this study	Jess & Claire
Indicator indicator	CV68921	M	72008116	150	18	yes	3820965	3.3	TBD	Niassa, Mozambique	this study	Jess & Claire
Indicator indicator	CV68922	F	72083191	150	18	yes	3784723	3.3	TBD	Niassa, Mozambique	this study	Jess & Claire
Indicator indicator	CV68924	F	62657638	150	15.7	yes	3721307	3.2	TBD	Niassa, Mozambique	this study	Jess & Claire
Indicator indicator	CV68926	F	66772482	150	16.7	yes	3743050	3.3	TBD	Niassa, Mozambique	this study	Jess & Claire
Indicator indicator	CV68927	M	72279583	150	18.1	yes	3800900	3.3	TBD	Niassa, Mozambique	this study	Jess & Claire
Indicator indicator	CV68928	F	72281336	150	18.1	yes	3785174	3.3	TBD	Niassa, Mozambique	this study	Jess & Claire
Indicator indicator	CV68930	M	70482869	150	17.6	yes	3786050	3.3	TBD	Niassa, Mozambique	this study	Jess & Claire
Indicator indicator	CV68933	M	71936158	150	18	yes	3806019	3.3	TBD	Niassa, Mozambique	this study	Jess & Claire
Indicator indicator	CV68941	M	72426929	150	18.1	yes	3798173	3.3	TBD	Niassa, Mozambique	this study	Jess & Claire
Indicator indicator	CV68943	F	71558337	150	17.9	yes	3766428	3.3	TBD	Niassa, Mozambique	this study	Jess & Claire
Indicator indicator	CV68944	F	72323398	150	18.1	yes	3786379	3.3	TBD	Niassa, Mozambique	this study	Jess & Claire
Indicator indicator	CV68947	F	72212614	150	18.1	yes	3760720	3.3	TBD	Niassa, Mozambique	this study	Jess & Claire
Indicator indicator	CV74605	F	72094454	150	18	yes	3769512	3.3	TBD	Niassa, Mozambique	this study	Jess & Claire
Indicator indicator	CV74606	F	66780789	150	16.7	yes	3748958	3.3	TBD	Niassa, Mozambique	this study	Jess & Claire
Indicator indicator	CV74612	M	69651270	150	17.4	yes	3796992	3.3	TBD	Niassa, Mozambique	this study	Jess & Claire
Indicator indicator	CV74618	F	72286767	150	18.1	yes	3748750	3.3	TBD	Niassa, Mozambique	this study	Jess & Claire
Indicator indicator	CV74621	F	72307797	150	18.1	yes	3751012	3.3	TBD	Niassa, Mozambique	this study	Jess & Claire
Indicator indicator	CV74624	M	72288946	150	18.1	yes	3784609	3.3	TBD	Niassa, Mozambique	this study	Jess & Claire
Indicator indicator	CV74629	F	67050920	150	16.8	yes	3745996	3.3	TBD	Niassa, Mozambique	this study	Jess & Claire
Indicator indicator	CV74631	M	69166417	150	17.3	yes	3801850	3.3	TBD	Niassa, Mozambique	this study	Jess & Claire
Indicator indicator	CV74637	F	70498744	150	17.6	yes	3751232	3.3	TBD	Niassa, Mozambique	this study	Jess & Claire
Indicator indicator	CV74646	F	69761795	150	17.4	yes	3778073	3.3	TBD	Niassa, Mozambique	this study	Jess & Claire
Indicator indicator	CV74733	F	65801634	150	16.5	yes	3754880	3.3	TBD	Niassa, Mozambique	this study	Jess & Claire
Indicator indicator	CV74737	F	69514227	150	17.4	yes	3760149	3.3	TBD	Niassa, Mozambique	this study	Jess & Claire
Indicator indicator	CV74740	F	72263828	150	18.1	yes	3766426	3.3	TBD	Niassa, Mozambique	this study	Jess & Claire
Indicator indicator	CV74742	F	72336932	150	18.1	yes	3777552	3.3	TBD	Niassa, Mozambique	this study	Jess & Claire
Indicator indicator	CV74743	F	72278216	150	18.1	yes	3772111	3.3	TBD	Niassa, Mozambique	this study	Jess & Claire
Indicator indicator	CV74755	F	72257492	150	18.1	yes			TBD	Niassa, Mozambique	this study	Jess & Claire
Heteronetta atricapilla	MS-A02	M	203557452	100	33.9	no			TBD	General Lavalle, Argentina	Smith et al. (bioRxiv)	Bruce Lyon, John Eadie, Melissa Jones
Heteronetta atricapilla	MS-A03	F	35375307	100	5.9	no			TBD	General Lavalle, Argentina	Smith et al. (bioRxiv)	Bruce Lyon, John Eadie, Melissa Jones
Heteronetta atricapilla	MS-B01	F	95501538	100	15.9	no			TBD	General Lavalle, Argentina	Smith et al. (bioRxiv)	Bruce Lyon, John Eadie, Melissa Jones
Heteronetta atricapilla	MS-B03	F	91973115	100	15.3	no			TBD	General Lavalle, Argentina	Smith et al. (bioRxiv)	Bruce Lyon, John Eadie, Melissa Jones
Heteronetta atricapilla	MS-C02	F	74812669	100	12.5	no			TBD	General Lavalle, Argentina	Smith et al. (bioRxiv)	Bruce Lyon, John Eadie, Melissa Jones
Heteronetta atricapilla	MS-D01	F	61837106	100	10.3	no			TBD	General Lavalle, Argentina	Smith et al. (bioRxiv)	Bruce Lyon, John Eadie, Melissa Jones
Heteronetta atricapilla	MS-E02	F	91660184	100	15.3	no			TBD	General Lavalle, Argentina	Smith et al. (bioRxiv)	Bruce Lyon, John Eadie, Melissa Jones
Heteronetta atricapilla	MS-E03	F	57220207	100	9.5	no			TBD	General Lavalle, Argentina	Smith et al. (bioRxiv)	Bruce Lyon, John Eadie, Melissa Jones
Heteronetta atricapilla	MS-F01	F	92448148	100	15.4	no			TBD	General Lavalle, Argentina	Smith et al. (bioRxiv)	Bruce Lyon, John Eadie, Melissa Jones
Heteronetta atricapilla	MS-F02	F	86399807	100	14.4	no			TBD	General Lavalle, Argentina	Smith et al. (bioRxiv)	Bruce Lyon, John Eadie, Melissa Jones
Heteronetta atricapilla	MS-F03	F	91814585	100	15.3	no			TBD	General Lavalle, Argentina	Smith et al. (bioRxiv)	Bruce Lyon, John Eadie, Melissa Jones
Heteronetta atricapilla	MS-G02	M	205230175	100	34.2	no			TBD	General Lavalle, Argentina	Smith et al. (bioRxiv)	Bruce Lyon, John Eadie, Melissa Jones
Heteronetta atricapilla	MS-G03	F	89113811	100	14.9	no			TBD	General Lavalle, Argentina	Smith et al. (bioRxiv)	Bruce Lyon, John Eadie, Melissa Jones
Heteronetta atricapilla	MS-H03	F	93237473	100	15.5	no			TBD	General Lavalle, Argentina	Smith et al. (bioRxiv)	Bruce Lyon, John Eadie, Melissa Jones
Taeniopygia castanotis	Tg_26462	F	142812145	100	23.8	no			ERR1013161	Fowler's Gap, Australia	Singhal et al. 2015
Taeniopygia castanotis	Tg_26516	M	161603450	100	26.9	no			ERR1013167	Fowler's Gap, Australia	Singhal et al. 2015
Taeniopygia castanotis	Tg_26721	F	140044770	100	23.3	no			ERR1013164	Fowler's Gap, Australia	Singhal et al. 2015
Taeniopygia castanotis	Tg_26733	M	145143253	100	24.2	no			ERR1013170	Fowler's Gap, Australia	Singhal et al. 2015
Taeniopygia castanotis	Tg_26781	M	162647627	100	27.1	no			ERR1013173	Fowler's Gap, Australia	Singhal et al. 2015
Taeniopygia castanotis	Tg_26792	M	175665692	100	29.3	no			ERR1013175	Fowler's Gap, Australia	Singhal et al. 2015
Taeniopygia castanotis	Tg_26795	F	143003808	100	23.8	no			ERR1013177	Fowler's Gap, Australia	Singhal et al. 2015
Taeniopygia castanotis	Tg_26820	F	127931656	100	21.3	no			ERR1013169	Fowler's Gap, Australia	Singhal et al. 2015
Taeniopygia castanotis	Tg_26881	F	115818588	100	19.3	no			ERR1013172	Fowler's Gap, Australia	Singhal et al. 2015
Taeniopygia castanotis	Tg_26896	F	128620755	100	21.4	no			ERR1013174	Fowler's Gap, Australia	Singhal et al. 2015
Taeniopygia castanotis	Tg_28016	F	136138576	100	22.7	no			ERR1013176	Fowler's Gap, Australia	Singhal et al. 2015
Taeniopygia castanotis	Tg_28078	F	148030800	100	24.7	no			ERR1013178	Fowler's Gap, Australia	Singhal et al. 2015
Taeniopygia castanotis	Tg_28313	M	168667474	100	28.1	no			ERR1013179	Fowler's Gap, Australia	Singhal et al. 2015
Taeniopygia castanotis	Tg_28339	F	160994092	100	26.8	no			ERR1013162	Fowler's Gap, Australia	Singhal et al. 2015
Taeniopygia castanotis	Tg_28353	M	144955321	100	24.2	no			ERR1013163	Fowler's Gap, Australia	Singhal et al. 2015
Taeniopygia castanotis	Tg_28402	M	126359816	100	21.1	no			ERR1013166	Fowler's Gap, Australia	Singhal et al. 2015
Taeniopygia castanotis	Tg_28404	M	126503589	100	21.1	no			ERR1013168	Fowler's Gap, Australia	Singhal et al. 2015
Taeniopygia castanotis	Tg_28456	F	156700760	100	26.1	no			ERR1013165	Fowler's Gap, Australia	Singhal et al. 2015
Taeniopygia castanotis	Tg_28481	M	120850692	100	20.1	no			ERR1013171	Fowler's Gap, Australia	Singhal et al. 2015
Falco peregrinus	SAMN17117209					no			SRS7899993	Kola Peninsula, Russia	Gu et al. 2021
Falco peregrinus	SAMN17118869					no			SRS7901079	Kola Peninsula, Russia	Gu et al. 2021
Falco peregrinus	SAMN17120864					no			SRS7902324	Kola Peninsula, Russia	Gu et al. 2021
Falco peregrinus	SAMN17120865					no			SRS7902326	Yamal Peninsula, Russia	Gu et al. 2021
Falco peregrinus	SAMN17120983					no			SRS7902341	Yamal Peninsula, Russia	Gu et al. 2021
Falco peregrinus	SAMN17125933					no			SRS7903705	Yamal Peninsula, Russia	Gu et al. 2021
Falco peregrinus	SAMN17125935					no			SRS7903856	Yamal Peninsula, Russia	Gu et al. 2021
Falco peregrinus	SAMN17125936					no			SRS7903857	Yamal Peninsula, Russia	Gu et al. 2021
Falco peregrinus	SAMN17125937					no			SRS7903764	Yamal Peninsula, Russia	Gu et al. 2021
Falco peregrinus	SAMN17125938					no			SRS7903860	Yamal Peninsula, Russia	Gu et al. 2021
Falco peregrinus	SAMN17125939					no			SRS7903704	Kola Peninsula, Russia	Gu et al. 2021
Falco peregrinus	SAMN17125946					no			SRS7903762	Kola Peninsula, Russia	Gu et al. 2021
Falco peregrinus	SAMN17141518					no			SRS7914476	Kolyma, Russia	Gu et al. 2021
Falco peregrinus	SAMN17141580					no			SRS7914477	Kolyma, Russia	Gu et al. 2021
Falco peregrinus	SAMN17154545					no			SRS7930192	Kolguyez Island, Russia	Gu et al. 2021
Falco peregrinus	SAMN17188551					no			SRS7949817	Kola Peninsula, Russia	Gu et al. 2021

## Sheet: 3 MKT genes positive DoS
Supplementary Table 3: genes under positive selection (p-value<0.01) in brood parasites and parental outgroups
whydah			indigobird			cuckoo finch			honeyguide			cowbird			long-tialed finch			woodpecker			blackbird
Gene	p-value imputed	DoS imputed	Gene	p-value imputed	DoS imputed	Gene	p-value imputed	DoS imputed	Gene	p-value imputed	DoS imputed	Gene	p-value imputed	DoS imputed	Gene	p-value imputed	DoS imputed	Gene	p-value imputed	DoS imputed	Gene	p-value imputed	DoS imputed
RNF213	8.63764e-08	0.293981	DNAH1	1.35336e-08	0.572115	ATAD2	0.000502387	0.4	CHD5	2.28195e-07	0.471429	LOC118685211	2.20942e-05	0.75	SLF2	0.00836592	0.571429	IHO1	0.0025907	0.43482	NBEAL2	1.42773e-06	0.569079
SI	2.5706e-06	0.356489	COL6A3	2.95204e-06	0.332803	LOC137473908	0.000738197	0.525	ROBO2	1.24148e-05	0.578125	RIF1	4.56578e-05	0.373798	CARMIL2	0.000186816	0.647343	HGSNAT	0.00962551	0.565217	PHF14	0.00952381	1
SPATA7	8.79597e-05	0.737705	LOC128791147	7.82335e-06	0.882353	MYOM1	0.00076116	0.285714	LOC128977599	9.00696e-05	0.397321	ADAM12	6.77081e-05	0.666667	LCT	0.00843167	0.295285	LOC104300401	0.00164696	0.590909	MRE11	0.00653595	1
WNK1	0.000169568	0.4	URI1	1.10785e-05	0.755	PTPRM	0.000473703	0.368421	VPS13C	0.000169069	0.279639	DOP1B	8.13419e-05	0.40825	LRRC49	0.00205058	0.666667	KMO	0.002997	0.833333	NOP2	0.00653595	1
COL6A3	0.000239611	0.246303	DNAH17	3.33014e-05	0.245004	FASTKD3	0.00505161	0.464744	CEP350	0.000237322	0.251058	MERTK	0.000129774	0.6	JCAD	0.00472747	0.607143	UBR3	0.00584893	0.428571	EML4	0.00833333	1
PLEKHG1	0.000304163	0.432005	ODF2	0.000123095	0.638636	DNAH5	0.00423244	0.273345	CILP	0.000511593	0.31068	RIPOR3	0.000158768	0.857143	ODF2	4.86263e-07	0.810345	OBSL1	0.000268709	0.313853	APOB	0.00073855	0.530713
TIGD4	0.000329584	0.884615	RXFP1	0.000128999	0.9	NUP153	0.00705324	0.308059	CIITA	0.000640121	0.487064	AATK	0.000248263	0.625	NFASC	0.00241151	0.280702	STK36	0.00859646	0.3375	TMEM214	0.00225861	0.75
LOC128815902	0.000346113	0.541026	ITGB2	0.000150228	0.541667	TRANK1	0.00170985	0.265476	KEL	0.00195069	0.673077	NEB	0.00025515	0.193775	XIRP2	0.00512228	0.533333	BRAT1	0.000544526	0.478632	ITIH2	0.0015873	1
TIAM1	0.000431625	0.495614	CCDC77	0.000193667	0.681992	CDCP1	0.000711543	0.5	PHKA1	0.00269799	0.45122	PIEZO1	0.000294538	0.352403	DOLK	0.00075188	1	ZP2	0.00953032	0.5	PPP1R12A	0.00653595	1
CSF2RB	0.000457996	0.513889	BRIP1	0.000249814	0.482759	LOC137485932	0.00630252	0.666667	ARAP2	0.00296787	0.365942	ACE	0.000345159	0.466667	LOC100223651	0.00425245	0.691176	GANC	0.000969619	0.833333	EPYC	0.00833333	1
ODF2	0.000541948	0.759259	ZNF518A	0.000332917	0.446203	LOC137463967	0.000273882	0.339931	SPAG6	0.00353017	0.723684	MEP1A	0.000363786	0.666667	RXRG	0.00853485	0.5	SFXN3	0.00138128	0.75	FAT4	0.000116323	0.348828
PCM1	0.000549617	0.473684	BEGAIN	0.000462386	0.75	DCHS1	0.000346918	0.195165	MIDEAS	0.0037107	0.42236	FASN	0.000368177	0.463636	POLH	0.00699301	0.8	PYROXD2	0.00859857	0.541667	NPNT	0.00478469	0.833333
MGA	0.000574497	0.371091	TIGD4	0.000479714	0.761905	BRWD1	0.00132261	0.258621	TENM3	0.00412797	0.75	WDR3	0.000457666	0.692308	UNC80	0.000720072	0.3	ABCC2	0.00996289	0.306818	LOC129120146	0.00968638	0.722222
HELZ2	0.000612246	0.34258	SI	0.000699004	0.314757	ACE2	0.00841473	0.38	DHX9	0.00480769	0.714286	LOC118689809	0.000524274	0.369565	DOCK2	0.000714368	0.572222	LOC104300091	0.000787366	0.369697	NEK1	0.00395257	1
NKTR	0.00094105	0.37594	PPRC1	0.000709314	0.523256	CCDC80	0.000136956	0.566667	ICE2	0.00496854	0.361009	LOC118688697	0.000618688	0.577381	MYH11	0.0057971	0.5	MORC3	0.000815721	0.5625	FAM193A	0.00526316	1
SLC6A14	0.000944036	0.644737	ANK3	0.000805106	0.27381	TNFRSF19	0.00111483	0.6	C7H10orf90	0.00520796	0.286834	ACE2	0.000679151	0.597222	HECW1	0.00174216	0.904762	SLC13A2	0.00309598	0.769231	LOC129121835	0.00522602	0.302083
ORC1	0.00108379	0.511166	ENPEP	0.000974824	0.559524	ATM	0.00113082	0.292208	CFTR	0.00605852	0.28125	SH3TC2	0.000707262	0.457576	SYBU	0.00630252	0.666667	SERPINF2	0.0013391	0.614286	MINPP1	0.00952381	1
ZC3H7A	0.0016476	0.722222	DRC7	0.00108594	0.497312	ABCC4	0.00147035	0.473684	FASN	0.00848027	0.266886	ACTL10	0.000714456	0.8	LOC100229347	0.000769623	0.695402	KEL	0.00632955	0.547619	LOC129123797	0.004662	0.857143
LOC128812725	0.00176345	0.614035	SLC6A12	0.00121368	0.5625	IFT172	0.00726495	0.27451	WNK4	0.00878752	0.373853	BBS7	0.000714456	0.777778	CFAP47	0.0035281	0.321136	UBAP1L	0.00260527	0.642857	ECEL1	0.00952381	1
SYNE1	0.00176503	0.197778	ZC3H7A	0.00121368	0.65	APOB	0.000651608	0.287634	QSER1	0.00921683	0.354962	UGGT2	0.000806997	0.52521	TENM2	0.00210526	0.5	BAHCC1	0.00893669	0.16	ANKRD11	0.00932101	0.625
LOC128815649	0.00185239	0.449275	SLC4A11	0.00131839	0.4	ZNF451	0.000312927	0.471429				CFH	0.000812103	0.441103	PPFIA4	0.00564972	0.4	DNAH17	4.9826e-07	0.306071	HEXA	0.00526316	1
FLT1	0.00199694	0.409091	MACF1	0.00153698	0.201693	COL12A1	0.00569739	0.15625				GGCX	0.00100686	0.642857	TRIM71	0.00854701	0.666667	PIWIL1	0.00309598	0.75	MINDY2	0.00879121	0.857143
LY75	0.00210692	0.367647	LOC128791192	0.00163828	0.594595	LOC137470474	0.00699301	0.8				IFI35	0.00109945	0.616667	FCSK	0.000242376	0.83871	EMILIN3	0.00228537	0.4	UNC13C	0.000303951	0.5
SHROOM3	0.00222725	0.257516	CRB1	0.00187422	0.4329	IGF2R	0.00914114	0.210714				GUCY2C	0.00116096	0.588235	DNAH10	0.000679031	0.363248	ANK3	0.00320181	0.250407	LOC129128068	0.00570776	0.333333
URI1	0.00224235	0.673077	ORC1	0.00226448	0.547619	RSPH3	0.00134608	0.666667				RNF213	0.00119234	0.246473	BMP2K	0.00286363	0.45	MISP	0.00387286	0.555556	LOC129128226	0.003282	0.490196
DLGAP5	0.00250927	0.596154	SLF2	0.00244937	0.421053	UTRN	0.000586635	0.244865				STARD8	0.00122631	0.545455	CRIM1	0.00395257	0.571429	ARHGEF12	0.00508438	0.428571	LOC129128307	0.00793651	1
PPM1E	0.0026087	0.545455	TSSK6	0.00255453	0.625	NUP133	0.00636105	0.544444				LOC118692220	0.00124071	0.355384	THBD	0.00888274	0.424908	NAV1	0.000776264	0.5	SPEN	0.000137983	0.627451
DZIP1	0.00267385	0.5	LOC128791439	0.00273168	0.583333	PCM1	0.00982322	0.277778				TSHZ2	0.00128999	0.8	RHNO1	0.004662	0.833333	UNC13B	0.00287539	0.424242	ERBB2	0.00980472	0.621212
CAPRIN2	0.002923	0.625	CENPN	0.00274725	0.916667	ZNF827	0.00376082	0.454545				MSH6	0.00130394	0.4	CNPPD1	0.00178571	1				CACTIN	0.00879121	0.75
WDR35	0.00299462	0.446429	BRWD1	0.002816	0.300228	NDST4	0.00349543	0.354839				PTPRC	0.0013791	0.455556	PHTF2	0.00645161	0.666667				AP3B1	0.00490196	0.75
TSPAN1	0.00309598	0.769231	ADAMTSL3	0.00300294	0.288793	LOC137472937	0.00180264	0.467433				FBLIM1	0.0015083	0.75	ANXA11	0.00610595	0.709091				SNCAIP	0.00649351	0.6
ACBD3	0.00309598	0.616667	TOPAZ1	0.0030205	0.382375	UPF2	0.00056899	0.444444				LOC118698730	0.00154799	0.666667	CHD7	0.00612759	0.642105				DMXL1	0.00198659	0.4
CCDC77	0.00315806	0.590476	CDAN1	0.00307571	0.5	CFTR	0.000932641	0.37037				OCA2	0.00156022	0.6	reg_9839	9.42359e-06	0.58215				ADGRV1	0.00922943	0.2799
BCO1	0.00326979	0.583333	LOC128785727	0.00309624	0.360507	RPAP3	0.00817927	0.420228				LRPPRC	0.00157921	0.533333	LOC100224709	0.00151403	0.548077				SKIC3	0.0025974	0.928571
PLCZ1	0.00358753	0.516667	LOC128784944	0.00386448	0.261289	ATF7IP	0.00160124	0.464286				LOC118697384	0.00169396	0.666667	PPP3CA	0.00454545	1
REV1	0.00367237	0.5	OTUD4	0.00401874	0.580645	NUP205	0.00136683	0.243902				LAG3	0.00172298	0.571429	HACE1	0.00877193	0.6
TNC	0.00377878	0.27027	MUC4	0.00405087	0.283044	CECR2	0.000921636	0.322511				ANPEP	0.00183316	0.494444	DCAF1	0.00663822	0.375
OC90	0.00386997	0.71875	LOC128792347	0.00411447	0.444444	MICAL3	0.00755175	0.246032				ENPEP	0.00183814	0.596154	LOC100219145	0.00264271	0.888889
LOC128811246	0.00392996	0.504274	PTPRO	0.00426519	0.322535	PLD4	0.00632955	0.51049				ZFC3H1	0.00188899	0.454545	C5	0.001526	0.632143
DTX3L	0.00414888	0.497674	CCPG1	0.00458818	0.571429	BTBD7	0.00711701	0.308081				GJD4	0.001998	0.833333	F8	0.00202125	0.425
POC1B	0.00457666	0.694444	SMG1	0.00461823	0.168675	AKAP6	0.00107843	0.391608				TTN	0.0020272	0.104707	DZIP1	6.77081e-05	0.6875
MMS22L	0.00475966	0.348039	CCDC63	0.00472069	0.488889	ZFYVE26	0.00627009	0.229064				LOC118687549	0.00217919	0.451429	GUCY2C	0.00526316	1
KCTD18	0.00479403	0.546667	LOC128795375	0.00490196	0.857143	MGA	0.00386284	0.225				SLC38A10	0.00225842	0.525641	LOC100225337	0.00879121	0.875
RNF6	0.00494531	0.528986	LOC128786341	0.00490393	0.56	CHAC1	0.00551646	0.615385				RADIL	0.00232345	0.555556	RBP3	0.00796844	0.527778
WDR17	0.00517666	0.534483	CEP192	0.00522385	0.5	MYBPC3	0.00642261	0.296296				NCAPD2	0.00241021	0.424242	POLR1B	0.00187617	0.5
TET1	0.00518219	0.277056	PRAG1	0.0053927	0.339286	LDLRAD3	0.00782609	0.611111				TRANK1	0.00244519	0.384211	BLK	0.00197628	0.916667
IGDCC3	0.00530703	0.391304	DRC3	0.00552311	0.653846	PLCB2	0.0014833	0.412442				DPEP1	0.00245262	0.5	COL6A3	1.81482e-08	0.580741
BBS10	0.00542326	0.456395	C8B	0.00574039	0.452381	HNMT	0.00361197	0.625				UBR4	0.00261499	0.185185	NOTCH2	0.00559418	0.25
NASP	0.00551646	0.615385	ZHX3	0.00600578	0.416667	THSD7B	0.008189	0.277778				PCDH8	0.00276517	0.333333	PLXNB2	0.00419287	0.5
CSF1R	0.00567316	0.441026	PTCD1	0.00662411	0.44	TMEM177	0.00138128	0.727273				NAV1	0.00297283	0.26087	HECTD4	0.00225752	0.25
DRC3	0.00592285	0.570707	LOC128787027	0.006962	0.506079	ABCB11	0.00138483	0.4				CD2	0.002997	0.833333	ANKRD6	0.00386997	0.666667
TAF1D	0.00592885	0.736842	BRD8	0.00715037	0.375	BOLL	0.00478469	0.833333				RELCH	0.002997	0.833333	TMEM67	0.00174318	0.575758
SH3D19	0.00602593	0.5	SYNRG	0.00751268	0.344828	TSSK6	1.02201e-05	0.727273				SLC46A1	0.002997	0.833333	TASOR	0.00540182	0.392857
SYCP2L	0.00657186	0.551075	BLK	0.00782609	0.611111	MAP2	0.00293335	0.313406				MAP2	0.00312152	0.533333	SUN2	0.00599448	0.433333
FAM171B	0.00670469	0.346154	CEP57	0.00812693	0.733333	UNC80	0.000920638	0.205882				RB1	0.00340185	0.602273	PAPPA	0.00725689	0.4
NOTCH2	0.00681948	0.1774	WDR35	0.00821936	0.435484	FN1	4.77812e-05	0.32943				ZBTB21	0.0034188	0.5	LOC115496941	0.00309598	0.714286
ASMTL	0.00682292	0.6	ZNF827	0.0086966	0.354839	IQCA1	0.00059913	0.479798				TTC31	0.00343249	0.633333	PPEF2	0.00610501	0.5
UNC80	0.00686079	0.258446	POLR3E	0.00902993	0.5625	LOC137477764	4.94376e-06	0.705882				MYRFL	0.00360748	0.603175	NRCAM	0.000393059	0.5
PTPRG	0.00719481	0.357143	ANKRD31	0.00928889	0.332792	PHYHIPL	0.00429785	0.547619				ATRX	0.00364654	0.339583	NUP205	0.0018797	0.96875
RTTN	0.00742383	0.258127	QRSL1	0.00949596	0.533333	KAT6B	0.00580564	0.341463				LOC118688251	0.003663	0.909091	reg_10515	0.00842206	0.533333
EXOSC10	0.00748031	0.384615	LOC128795658	0.00954592	0.583333	SORBS1	0.00559316	0.36166				HGFAC	0.00386997	0.733333	ADAD1	0.00963145	0.423993
GPC3	0.00777362	0.433333	LRIG3	0.00967866	0.454545	RBP3	0.00337543	0.413793				ASB6	0.00386997	0.666667	VWA8	0.000831316	0.415033
PDCD1	0.00780724	0.55	CFAP44	0.00978165	0.347709	ZNF518A	2.4611e-05	0.575				CDH8	0.00386997	0.666667	SHROOM3	0.00597159	0.439726
DNAH8	0.00793923	0.193582	NDST4	0.00981627	0.5	LOC137478196	0.00612387	0.372807				ACAN	0.00388879	0.281385	TSC22D1	0.00386997	0.857143
ACSBG1	0.00800509	0.417293				POLL	0.00403644	0.5				LRRK1	0.00396449	0.384615	RELN	0.00701173	0.370879
TNRC18	0.00800728	0.171429				TRUB1	0.00699301	0.714286				NFASC	0.0040107	0.4	COL4A2	0.000148899	0.4825
FGA	0.00824972	0.578947				ORC1	0.0044909	0.44359				KIF24	0.00406232	0.416667	LOC100223312	0.00327815	0.642857
ZC3H3	0.00850151	0.303406				LDLRAD1	0.000464396	0.846154				HIVEP1	0.00410803	0.328482	LOC100226679	0.00395257	1
HHATL	0.00859857	0.513889				OMA1	0.00189119	0.520468				LOC118692124	0.00443756	0.657143	MAP3K21	0.00226244	0.777778
PTPRB	0.00881132	0.269231				SI	3.89712e-05	0.321879				CEP170B	0.00445046	0.315789	LOC100220534	0.000167084	1
HSF4	0.00883434	0.527778				PRSS56	0.00685782	0.415385				CRYBG2	0.00448964	0.4	MFGE8	0.00490196	0.888889
HABP2	0.00884048	0.444444				AMER3	0.00995945	0.348485				INF2	0.0046307	0.489474	AP2B1	0.00305577	0.5
SLC6A12	0.00891605	0.470588				LOC137480598	0.000255172	0.488226				LOC118694907	0.00478469	0.571429	ABCB6	0.00526316	1
ZFYVE9	0.00897207	0.385965				TASOR	2.81996e-06	0.526829				PLCH2	0.00482855	0.288571	LOC100223270	6.88903e-05	0.666667
LOC128804211	0.00914704	0.484211				TRADD	0.00472136	0.625				LOC118696178	0.00487805	0.871795	TENT2	0.000999001	1
LIG4	0.00950844	0.426667				BCO1	0.000944965	0.608333				AKAP1	0.00500456	0.410628	VGLL2	0.00833333	1
LOC128803120	0.00954592	0.583333				PCSK6	0.00963134	0.557143				NRIP1	0.00521739	0.5	SLC25A47	0.00833333	1
FNDC11	0.00956938	0.705882				ADAMTS17	0.00304505	0.333333				HELZ2	0.00562126	0.288961	GRID1	0.00952381	0.5
LOC128809782	0.00983406	0.293103				AP4E1	0.000485771	0.517241				TANC1	0.00566811	0.349091	LOC100231529	0.00833333	1
LOC128811079	0.00988447	0.72973				TJP1	9.26956e-05	0.615385				LOC118694955	0.00569844	0.314073	RNF139	0.00309598	0.666667
						LOC137482336	0.00699301	0.714286				LOC118689264	0.0057971	0.595238	LOC100218261	0.004662	0.8
						MEIKIN	0.00670595	0.764706				LOC118695022	0.00584795	0.571429	TRAPPC8	0.00492611	0.5
						HMGXB3	1.76755e-05	0.5				CRYBG3	0.00595369	0.290752	TANC1	0.00181296	0.4
						XYLT1	0.00913184	0.403226				SYNPO2	0.00601816	0.361111	GBE1	0.00683761	0.5
						SMG1	0.000181363	0.182927				LOC118697739	0.00630252	0.666667	NOC4L	0.004329	1
						LMTK2	0.00224887	0.444444				LOC118692511	0.00636019	0.395833	LOC100231076	0.00699301	0.714286
						SUN1	0.00806839	0.3625				SETD5	0.00653595	0.625	CABIN1	0.000275988	0.416667
						SDK1	0.00533542	0.216216				TBL3	0.00658762	0.5	MRE11	3.95257e-05	0.909091
						TTI1	5.07083e-05	0.613636				TOP3A	0.00658762	0.5	ARHGEF38	0.00879121	0.75
						LOC137484115	0.00298882	0.441026				FGG	0.00661413	0.541667	N4BP1	0.000158768	0.875
						TPX2	0.000791766	0.576923				TTC21B	0.00679768	0.4375	WDR19	0.00869565	0.5
						CLIP1	0.000590935	0.359667				EXOSC10	0.00682292	0.6	DNAJB8	0.0013986	0.8
						FASN	0.0076082	0.380208				LOC118690924	0.00697724	0.323671	LOC100226503	0.00362319	1
						RNF213	0.000402729	0.191017				LOC118696483	0.00699301	0.75	LOC100232469	0.002997	0.833333
						EVPL	0.00117337	0.309524				TMPRSS15	0.0071293	0.505882	ADAMTS17	0.00168067	1
						BPTF	0.000383905	0.308123				DUOXA2	0.00793651	1
						ATP2A3	0.00758048	0.263158				LOC118698767	0.00793651	1
						LIG3	0.00402912	0.32				IRF7	0.00794185	0.547619
						BRIP1	0.00115782	0.41502				CR1	0.00813551	0.204013
						LOC137486047	0.00417121	0.451389				USP6NL	0.00824176	0.666667
						ODF2	3.11325e-05	0.659091				HACL1	0.00833333	1
						WDR31	0.00074646	0.75				TSPAN8	0.00833333	1
						SPEN	0.000693469	0.193355				LOC118688958	0.00874126	0.690476
						USP28	0.0015685	0.416667				DMD	0.0087912	0.176407
						MYO9B	0.00154786	0.344388				PPEF1	0.00884127	0.475
						DDHD2	0.00215564	0.416667				ELP2	0.00892219	0.618182
						MYO5B	0.00314721	0.319175				VTN	0.00904977	0.666667
						UNC13B	0.00704136	0.342593				CASP2	0.00904977	0.75
						DMXL1	0.000758803	0.368				LOC118689901	0.00905543	0.313725
												CENPT	0.00949577	0.555556
												CLMN	0.00965701	0.75
												TICAM1	0.00978298	0.345411
												TNFAIP3	0.00988142	0.5
												VPS50	0.0099416	0.357143

## Sheet: 4 MKT genes negative DoS
Supplementary Table 4: genes with negative Direction of Selection (p-value<0.01) in brood parasites and parental outgroups
whydah			indigobird			cuckoo finch			honeyguide			cowbird			long-tialed finch			woodpecker			blackbird
Gene	p-value imputed	DoS imputed	Gene	p-value imputed	DoS imputed	Gene	p-value imputed	DoS imputed	Gene	p-value imputed	DoS imputed	Gene	p-value imputed	DoS imputed	Gene	p-value imputed	DoS imputed	Gene	p-value imputed	DoS imputed	Gene	p-value imputed	DoS imputed
C8H10orf71	2.16571e-09	-0.413535	WDR6	5.91375e-07	-0.56682	TERT	0.00503719	-0.282913	PRDM8	1.59775e-06	-0.5625	ERICH6	2.85132e-07	-0.816667	TOPAZ1	0.00368257	-0.325556	RPN1	0.00748908	-0.5	AGBL2	0.0044241	-0.565934
PAPPA2	1.26441e-05	-0.478395	NCKAP5	1.2495e-05	-0.396491	LOC137470995	0.00823815	-0.346364	PDZD7	4.26398e-06	-0.512963	FLNC	1.31052e-05	-0.309071	BEND2	0.00324531	-0.387879	DTHD1	0.00251441	-0.375	PRG4	0.00592976	-0.246595
LONRF3	0.000188202	-0.632353	NFKB2	2.14141e-05	-0.5	OTULINL	0.00138166	-0.547619	AHNAK2	1.62664e-05	-0.213327	LOC118694563	8.5556e-05	-0.630682				ABCA12	0.000456787	-0.384615
SLCO3A1	0.000333887	-0.666667	THSD1	6.58471e-05	-0.52381	SLC9A2	0.00278515	-0.6	PLXNB2	3.21364e-05	-0.559524	DHX9	0.000161759	-0.666667				RETREG2	0.00934412	-0.583333
VPS8	0.000634283	-0.475	FLT4	7.40707e-05	-0.5	HSPA13	0.00225552	-0.431818	ABCA12	4.36664e-05	-0.320028	SPEF2	0.000412044	-0.324213				KIF26A	0.000653617	-0.432624
MTUS1	0.00113672	-0.377193	TACC2	8.50323e-05	-0.444508	TRPC4	0.00326979	-0.638889	KLHDC4	4.36921e-05	-0.464286	RIOX1	0.000955317	-0.525641				RGL1	2.35027e-06	-0.666667
NRG3	0.00137634	-0.589286	LGSN	9.62035e-05	-0.61086	JADE3	0.00734776	-0.413043	DAPK2	7.31731e-05	-0.52	SEMA6C	0.00116871	-0.644231				TRAF3IP2	0.000901822	-0.448889
ATP2B2	0.00166159	-0.388889	DPYD	0.000256001	-0.593103	DCBLD1	0.00157921	-0.571429	NOP14	7.60221e-05	-0.483333	ODAD2	0.00142257	-0.560606
ADPRHL1	0.00188899	-0.666667	PHF3	0.000259428	-0.460526	CEP85L	0.000238917	-0.466667	OTOA	0.000176573	-0.388235	PRRT3	0.00151565	-0.383333
LRRC66	0.00240865	-0.258454	NT5E	0.000346115	-0.579365	MTCL3	0.00837713	-0.5	RFT1	0.000278065	-0.447674	CARNS1	0.00160642	-0.577778
MAP7D3	0.00291828	-0.514706	ROR2	0.0003608	-0.616667	IYD	4.70608e-05	-0.833333	PLK3	0.000393154	-0.583333	ADGRD2	0.00202694	-0.469697
NLGN3	0.00359207	-0.341599	OPHN1	0.000459833	-0.571429	PHACTR2	0.000422106	-0.527778	PI4KA	0.001195	-0.485294	TDRD6	0.00215499	-0.313725
LOC128804311	0.00360951	-0.268421	BCAR3	0.000674159	-0.5	SPRTN	1.7822e-05	-0.65	CCDC73	0.00126802	-0.238462	LINS1	0.00215817	-0.410628
LOC128808986	0.00404555	-0.359477	LOC128796152	0.000823035	-0.416667	RPS6KC1	0.00663897	-0.375758	CCDC177	0.00184094	-0.345771	IL1RL1	0.0022382	-0.560606
ZNF407	0.00437337	-0.6	METTL15	0.000885718	-0.549451	DLC1	0.00736778	-0.32266	TMEM104	0.00199409	-0.371951	TMX3	0.00249585	-0.464646
TMEM94	0.00548383	-0.447368	SYN3	0.00143401	-0.507353	TMEM192	0.00904977	-0.666667	DTX4	0.0026611	-0.309859	KIAA1671	0.00270639	-0.35755
CCDC174	0.00608271	-0.483333	ZC3H12C	0.00147414	-0.488095	POLN	0.000931993	-0.38172	WDHD1	0.00281452	-0.75	MUC6	0.00321195	-0.277098
HCFC2	0.0064214	-0.5	GPC5	0.00170669	-0.6	CPED1	0.00819464	-0.388889	JCAD	0.0028851	-0.299054	DNAAF1	0.00404831	-0.378205
ADGRG6	0.00656364	-0.375	UBR2	0.0017171	-0.431818	GYS2	0.00818776	-0.458333	PTPRF	0.00316042	-0.189435	BAIAP2L1	0.00411113	-0.6
FNDC3A	0.0072073	-0.396552	EGF	0.00188259	-0.382653	TECPR2	0.00294817	-0.333333	CFAP44	0.00333145	-0.427778	SEMA4B	0.00416339	-0.484615
PGR	0.00770991	-0.54902	CLIP4	0.00190706	-0.464286	ITGB5	1.64102e-05	-0.6	H6PD	0.00334361	-0.366667	LOC118694727	0.0047439	-0.625
CDK5RAP1	0.00800601	-0.371429	MINDY4	0.00194661	-0.857143	LOC137477116	0.00438278	-0.42915	SH2B3	0.00343427	-0.440252	PHACTR4	0.00522109	-0.575758
SETBP1	0.00817217	-0.390625	PCSK5	0.00195331	-0.616667	LOC137477204	0.000426247	-0.65	DNAAF9	0.00380325	-0.401961	NSMAF	0.00534759	-0.666667
CCDC88A	0.00840191	-0.574074	NAV1	0.00204617	-0.598485	ITPRID2	0.00839936	-0.505882	AUTS2	0.0046724	-0.38	ARID1B	0.0057971	-0.666667
DAB2IP	0.00925081	-0.388889	CAPZA3	0.00218438	-0.398148	CPO	0.00276313	-0.531746	PHF19	0.00529887	-0.440252	SLC5A12	0.0057971	-0.666667
SH3RF1	0.00941378	-0.335	SEMA5B	0.00289661	-0.333333	TACC2	0.00724953	-0.3	SMAD6	0.00556286	-0.466667	RBM6	0.00592285	-0.566667
SLAIN2	0.00949577	-0.5	TTC21B	0.0029746	-0.427536	SYDE2	0.0077706	-0.311111	FBXO38	0.00634965	-0.454545	TEX2	0.00614572	-0.555556
SHC4	0.00986062	-0.541667	MATN2	0.00307126	-0.377193	GLIS1	4.48263e-05	-0.638889	CTNND1	0.00655698	-0.322917	SLC12A3	0.00651274	-0.358852
			ITSN2	0.00307947	-0.35122	HRG	0.00540182	-0.403846	ACAD10	0.00736412	-0.26294	RECQL5	0.00673321	-0.5
			NLGN3	0.00334959	-0.357407	IRS4	0.00215564	-0.416667	NAA25	0.0074188	-0.349206	SLF2	0.00691584	-0.564706
			EEA1	0.0036109	-0.573529	TXNRD2	0.00107091	-0.583333	AKAP12	0.00858627	-0.212674	RSAD1	0.00697755	-0.607143
			PGM2	0.00411113	-0.6				CDH22	0.00980074	-0.297619	TES	0.00699301	-0.8
			PIK3C2G	0.00431181	-0.381818							POLE	0.00702962	-0.479167
			AHR	0.00452191	-0.54902							OGFR	0.00729744	-0.274929
			CPEB2	0.00457666	-0.714286							GALC	0.00780724	-0.625
			N6AMT1	0.00467157	-0.541667							GANC	0.00822139	-0.55
			PYGB	0.00552899	-0.575758							LOC118693927	0.00843597	-0.328571
			DOCK2	0.00563386	-0.320378							DDC	0.00904977	-0.75
			BTBD9	0.0057971	-0.5							EXO1	0.00966692	-0.466667
			ARHGAP29	0.0060732	-0.55
			MYLK3	0.0062415	-0.440909
			LOC128795565	0.00659993	-0.441176
			CPA6	0.00678263	-0.568182
			CMYA5	0.00689233	-0.20802
			AFF3	0.00711128	-0.535294
			CFAP43	0.00759068	-0.245098
			NEK1	0.00841215	-0.402778
			MYO5C	0.00895124	-0.344186
			F5	0.0089553	-0.296023
			GLDN	0.00922057	-0.519231
			PARG	0.00922057	-0.535714

## Sheet: 5 GO enrichment MKT pos DoS
Supplementary Table 5: GO enrichment analysis on the set of genes under positive selection in brood parasites and parental outgroups
group	ID	Description	GeneRatio	BgRatio	pvalue	p.adjust	qvalue	geneID	Count
whydah	GO:0044782	cilium organization	8/63	325/11598	0.000352897	0.273805	0.273805	RTTN/DZIP1/DNAH8/WDR35/PCM1/POC1B/BBS10/ODF2	8
whydah	GO:0031023	microtubule organizing center organization	5/63	127/11598	0.000615293	0.273805	0.273805	RTTN/DZIP1/PCM1/POC1B/ODF2	5
whydah	GO:0060271	cilium assembly	7/63	304/11598	0.00124833	0.370338	0.370338	DZIP1/DNAH8/WDR35/PCM1/POC1B/BBS10/ODF2	7
whydah	GO:0001895	retina homeostasis	3/63	50/11598	0.00249613	0.511693	0.511693	POC1B/BBS10/SPATA7	3
whydah	GO:0007098	centrosome cycle	4/63	112/11598	0.00316812	0.511693	0.511693	RTTN/PCM1/POC1B/ODF2	4
whydah	GO:0061512	protein localization to cilium	3/63	56/11598	0.00344962	0.511693	0.511693	DZIP1/WDR35/SPATA7	3
whydah	GO:0035567	non-canonical Wnt signaling pathway	3/63	68/11598	0.0059556	0.706251	0.706251	TIAM1/GPC3/RNF213	3
whydah	GO:0032092	positive regulation of protein binding	3/63	76/11598	0.00810179	0.706251	0.706251	TIAM1/CAPRIN2/DTX3L	3
whydah	GO:0006260	DNA replication	5/63	234/11598	0.00870814	0.706251	0.706251	REV1/LIG4/MMS22L/NASP/ORC1	5
whydah	GO:0030316	osteoclast differentiation	3/63	79/11598	0.00900942	0.706251	0.706251	NOTCH2/GPC3/CSF1R	3
indigobird	GO:0007286	spermatid development	7/50	117/11826	5.44195e-07	0.00026412	0.000261017	CFAP44/CEP57/TSSK6/DRC7/DNAH1/CCDC63/BRIP1	7
indigobird	GO:0048515	spermatid differentiation	7/50	124/11826	8.07706e-07	0.00026412	0.000261017	CFAP44/CEP57/TSSK6/DRC7/DNAH1/CCDC63/BRIP1	7
indigobird	GO:0007283	spermatogenesis	9/50	364/11826	1.84255e-05	0.00318248	0.00314509	TOPAZ1/CFAP44/CEP57/TSSK6/DRC7/DNAH1/CCDC63/BRIP1/ODF2	9
indigobird	GO:0035082	axoneme assembly	5/50	80/11826	2.0843e-05	0.00318248	0.00314509	CFAP44/DRC7/DNAH1/CCDC63/DNAH17	5
indigobird	GO:0048232	male gamete generation	9/50	377/11826	2.43309e-05	0.00318248	0.00314509	TOPAZ1/CFAP44/CEP57/TSSK6/DRC7/DNAH1/CCDC63/BRIP1/ODF2	9
indigobird	GO:0022412	cellular process involved in reproduction in multicellular organism	8/50	296/11826	3.01596e-05	0.0032874	0.00324877	TOPAZ1/CFAP44/CEP57/TSSK6/DRC7/DNAH1/CCDC63/BRIP1	8
indigobird	GO:0007281	germ cell development	7/50	220/11826	3.54699e-05	0.0033139	0.00327497	CFAP44/CEP57/TSSK6/DRC7/DNAH1/CCDC63/BRIP1	7
indigobird	GO:0001578	microtubule bundle formation	5/50	107/11826	8.46076e-05	0.00691667	0.00683541	CFAP44/DRC7/DNAH1/CCDC63/DNAH17	5
indigobird	GO:0003341	cilium movement	5/50	125/11826	0.000176306	0.0128116	0.012661	CFAP44/DRC7/DNAH1/CCDC63/DNAH17	5
indigobird	GO:0060271	cilium assembly	7/50	314/11826	0.000325999	0.0213203	0.0210698	CFAP44/WDR35/DRC7/DNAH1/CCDC63/DNAH17/ODF2	7
indigobird	GO:0044782	cilium organization	7/50	335/11826	0.000481529	0.0286291	0.0282927	CFAP44/WDR35/DRC7/DNAH1/CCDC63/DNAH17/ODF2	7
indigobird	GO:0001539	cilium or flagellum-dependent cell motility	4/50	93/11826	0.000625962	0.0314907	0.0311207	CFAP44/DRC7/DNAH1/DNAH17	4
indigobird	GO:0060285	cilium-dependent cell motility	4/50	93/11826	0.000625962	0.0314907	0.0311207	CFAP44/DRC7/DNAH1/DNAH17	4
indigobird	GO:0044458	motile cilium assembly	3/50	49/11826	0.00114266	0.0533786	0.0527514	CFAP44/DRC7/DNAH1	3
indigobird	GO:0007018	microtubule-based movement	6/50	317/11826	0.00208271	0.090806	0.089739	CFAP44/WDR35/DRC7/DNAH1/CCDC63/DNAH17	6
indigobird	GO:0030317	flagellated sperm motility	3/50	76/11826	0.00402495	0.154842	0.153023	CFAP44/DRC7/DNAH1	3
indigobird	GO:0097722	sperm motility	3/50	76/11826	0.00402495	0.154842	0.153023	CFAP44/DRC7/DNAH1	3
indigobird	GO:0060294	cilium movement involved in cell motility	3/50	85/11826	0.0055066	0.200073	0.197723	CFAP44/DRC7/DNAH1	3
cuckoo finch	GO:0051236	establishment of RNA localization	6/88	118/11719	0.000253835	0.155815	0.152856	NUP153/ATM/NUP133/UPF2/NUP205/SMG1	6
cuckoo finch	GO:0045143	homologous chromosome segregation	4/88	45/11719	0.000349684	0.155815	0.152856	ATM/MEIKIN/SUN1/BRIP1	4
cuckoo finch	GO:0048232	male gamete generation	10/88	362/11719	0.000369813	0.155815	0.152856	ATM/APOB/IGF2R/CFTR/BOLL/TSSK6/MEIKIN/SUN1/BRIP1/ODF2	10
cuckoo finch	GO:0051028	mRNA transport	5/88	88/11719	0.000511179	0.161533	0.158465	NUP153/NUP133/UPF2/NUP205/SMG1	5
cuckoo finch	GO:0070192	chromosome organization involved in meiotic cell cycle	4/88	57/11719	0.000865725	0.180074	0.176655	ATM/MEIKIN/SUN1/BRIP1	4
cuckoo finch	GO:0006403	RNA localization	6/88	149/11719	0.000878648	0.180074	0.176655	NUP153/ATM/NUP133/UPF2/NUP205/SMG1	6
cuckoo finch	GO:0015931	nucleobase-containing compound transport	6/88	160/11719	0.00127064	0.180074	0.176655	NUP153/ABCC4/NUP133/UPF2/NUP205/SMG1	6
cuckoo finch	GO:0031570	DNA integrity checkpoint signaling	5/88	109/11719	0.00134785	0.180074	0.176655	ATM/ORC1/TTI1/BRIP1/USP28	5
cuckoo finch	GO:0006405	RNA export from nucleus	4/88	66/11719	0.00150067	0.180074	0.176655	NUP153/NUP133/UPF2/SMG1	4
cuckoo finch	GO:0006997	nucleus organization	5/88	112/11719	0.00152079	0.180074	0.176655	NUP153/NUP133/NUP205/TSSK6/SUN1	5
cuckoo finch	GO:0050657	nucleic acid transport	5/88	115/11719	0.00170956	0.180074	0.176655	NUP153/NUP133/UPF2/NUP205/SMG1	5
cuckoo finch	GO:0050658	RNA transport	5/88	115/11719	0.00170956	0.180074	0.176655	NUP153/NUP133/UPF2/NUP205/SMG1	5
cuckoo finch	GO:0016485	protein processing	6/88	184/11719	0.0025799	0.250845	0.246083	ACE2/IFT172/CHAC1/LDLRAD3/OMA1/PCSK6	6
cuckoo finch	GO:0045132	meiotic chromosome segregation	4/88	83/11719	0.00347413	0.313664	0.307708	ATM/MEIKIN/SUN1/BRIP1	4
cuckoo finch	GO:0006338	chromatin remodeling	7/88	265/11719	0.00373248	0.314523	0.308551	ZNF827/ATF7IP/CECR2/KAT6B/TASOR/TTI1/BPTF	7
cuckoo finch	GO:0007283	spermatogenesis	8/88	349/11719	0.00462693	0.345214	0.338659	APOB/IGF2R/CFTR/BOLL/TSSK6/SUN1/BRIP1/ODF2	8
cuckoo finch	GO:0007127	meiosis I	4/88	90/11719	0.00464291	0.345214	0.338659	ATM/MEIKIN/SUN1/BRIP1	4
cuckoo finch	GO:0061982	meiosis I cell cycle process	4/88	93/11719	0.00521599	0.366279	0.359324	ATM/MEIKIN/SUN1/BRIP1	4
cuckoo finch	GO:0006406	mRNA export from nucleus	3/88	50/11719	0.00621741	0.410718	0.402919	NUP133/UPF2/SMG1	3
cuckoo finch	GO:0000075	cell cycle checkpoint signaling	5/88	157/11719	0.0064987	0.410718	0.402919	ATM/ORC1/TTI1/BRIP1/USP28	5
cuckoo finch	GO:0031122	cytoplasmic microtubule organization	3/88	52/11719	0.00693548	0.414544	0.406673	IFT172/PCM1/CLIP1	3
cuckoo finch	GO:0000077	DNA damage checkpoint signaling	4/88	102/11719	0.00721516	0.414544	0.406673	ATM/TTI1/BRIP1/USP28	4
honeyguide	GO:0007286	spermatid development	3/17	111/10979	0.000616837	0.121133	0.121046	CFTR/SPAG6/CHD5	3
honeyguide	GO:0048515	spermatid differentiation	3/17	116/10979	0.00070147	0.121133	0.121046	CFTR/SPAG6/CHD5	3
honeyguide	GO:0022412	cellular process involved in reproduction in multicellular organism	4/17	275/10979	0.000708379	0.121133	0.121046	ROBO2/CFTR/SPAG6/CHD5	4
honeyguide	GO:0007281	germ cell development	3/17	204/10979	0.00354657	0.310281	0.310058	CFTR/SPAG6/CHD5	3
honeyguide	GO:0006869	lipid transport	3/17	289/10979	0.00933518	0.310281	0.310058	CFTR/VPS13C/WNK4	3
cowbird	GO:0002449	lymphocyte mediated immunity	7/85	154/11525	0.000136925	0.0526937	0.0482586	LAG3/CD2/MSH6/IRF7/RIF1/PTPRC/CR1	7
cowbird	GO:0002443	leukocyte mediated immunity	8/85	211/11525	0.000158817	0.0526937	0.0482586	LAG3/CD2/MSH6/IRF7/RIF1/PTPRC/CR1/TICAM1	8
cowbird	GO:0032623	interleukin-2 production	4/85	42/11525	0.000249118	0.0526937	0.0482586	LAG3/TNFAIP3/PTPRC/CR1	4
cowbird	GO:0032663	regulation of interleukin-2 production	4/85	42/11525	0.000249118	0.0526937	0.0482586	LAG3/TNFAIP3/PTPRC/CR1	4
cowbird	GO:0002252	immune effector process	10/85	353/11525	0.000259656	0.0526937	0.0482586	LAG3/CD2/MSH6/IRF7/RIF1/CFHR5/PTPRC/CR1/TICAM1/IFI35	10
cowbird	GO:0030101	natural killer cell activation	4/85	46/11525	0.000355145	0.0526937	0.0482586	CD2/MERTK/PTPRC/TICAM1	4
cowbird	GO:0016064	immunoglobulin mediated immune response	5/85	84/11525	0.000378838	0.0526937	0.0482586	MSH6/IRF7/RIF1/PTPRC/CR1	5
cowbird	GO:0016485	protein processing	7/85	183/11525	0.000394569	0.0526937	0.0482586	ACE2/CASP2/MEP1A/ENPEP/FGG/HGFAC/MYRFL	7
cowbird	GO:0019724	B cell mediated immunity	5/85	85/11525	0.000400205	0.0526937	0.0482586	MSH6/IRF7/RIF1/PTPRC/CR1	5
cowbird	GO:0051604	protein maturation	8/85	252/11525	0.000526602	0.0624023	0.0571502	ACE2/CASP2/MEP1A/ENPEP/FGG/HGFAC/MYRFL/DUOXA2	8
cowbird	GO:0050864	regulation of B cell activation	5/85	95/11525	0.000667397	0.0718969	0.0658456	TNFAIP3/RIF1/PTPRC/CR1/TICAM1	5
cowbird	GO:0050866	negative regulation of cell activation	6/85	150/11525	0.000825834	0.0815511	0.0746873	LAG3/MERTK/TNFAIP3/FGG/PTPRC/CR1	6
cowbird	GO:0001906	cell killing	4/85	66/11525	0.00140261	0.127854	0.117093	LAG3/CD2/PTPRC/CR1	4
cowbird	GO:0002819	regulation of adaptive immune response	5/85	114/11525	0.00151616	0.128332	0.117531	TNFAIP3/IRF7/RIF1/PTPRC/CR1	5
cowbird	GO:0002460	adaptive immune response based on somatic recombination of immune receptors built from immunoglobulin superfamily domains	6/85	177/11525	0.00193421	0.139511	0.127769	MSH6/TNFAIP3/IRF7/RIF1/PTPRC/CR1	6
cowbird	GO:0002705	positive regulation of leukocyte mediated immunity	4/85	72/11525	0.00193628	0.139511	0.127769	LAG3/RIF1/PTPRC/TICAM1	4
cowbird	GO:0002312	B cell activation involved in immune response	4/85	74/11525	0.00214158	0.139511	0.127769	MSH6/RIF1/PTPRC/CR1	4
cowbird	GO:0002250	adaptive immune response	7/85	248/11525	0.00232709	0.139511	0.127769	LAG3/MSH6/TNFAIP3/IRF7/RIF1/PTPRC/CR1	7
cowbird	GO:0050778	positive regulation of immune response	9/85	392/11525	0.00233383	0.139511	0.127769	LAG3/TNFAIP3/IRF7/RIF1/CFHR5/PTPRC/CR1/TICAM1/IFI35	9
cowbird	GO:0002703	regulation of leukocyte mediated immunity	5/85	126/11525	0.00235461	0.139511	0.127769	LAG3/RIF1/PTPRC/CR1/TICAM1	5
cowbird	GO:0002695	negative regulation of leukocyte activation	5/85	132/11525	0.0028815	0.155128	0.142071	LAG3/MERTK/TNFAIP3/PTPRC/CR1	5
cowbird	GO:0002366	leukocyte activation involved in immune response	6/85	193/11525	0.00298278	0.155128	0.142071	MSH6/RIF1/PTPRC/CR1/TICAM1/IFI35	6
cowbird	GO:0051249	regulation of lymphocyte activation	8/85	332/11525	0.00305358	0.155128	0.142071	LAG3/CD2/MERTK/TNFAIP3/RIF1/PTPRC/CR1/TICAM1	8
cowbird	GO:0034113	heterotypic cell-cell adhesion	3/85	40/11525	0.00314182	0.155128	0.142071	CD2/FGG/PTPRC	3
cowbird	GO:0002263	cell activation involved in immune response	6/85	197/11525	0.00330109	0.156472	0.143302	MSH6/RIF1/PTPRC/CR1/TICAM1/IFI35	6
cowbird	GO:0002377	immunoglobulin production	4/85	85/11525	0.00354481	0.158743	0.145382	MSH6/RIF1/PTPRC/CR1	4
cowbird	GO:0042113	B cell activation	6/85	202/11525	0.0037339	0.158743	0.145382	MSH6/TNFAIP3/RIF1/PTPRC/CR1/TICAM1	6
cowbird	GO:0002699	positive regulation of immune effector process	5/85	142/11525	0.003942	0.158743	0.145382	LAG3/RIF1/PTPRC/CR1/TICAM1	5
cowbird	GO:0002440	production of molecular mediator of immune response	5/85	143/11525	0.00406154	0.158743	0.145382	MSH6/RIF1/PTPRC/CR1/TICAM1	5
cowbird	GO:0002706	regulation of lymphocyte mediated immunity	4/85	90/11525	0.00435083	0.158743	0.145382	LAG3/RIF1/PTPRC/CR1	4
cowbird	GO:0002204	somatic recombination of immunoglobulin genes involved in immune response	3/85	46/11525	0.00467644	0.158743	0.145382	MSH6/RIF1/PTPRC	3
cowbird	GO:0002208	somatic diversification of immunoglobulins involved in immune response	3/85	46/11525	0.00467644	0.158743	0.145382	MSH6/RIF1/PTPRC	3
cowbird	GO:0045190	isotype switching	3/85	46/11525	0.00467644	0.158743	0.145382	MSH6/RIF1/PTPRC	3
cowbird	GO:0032640	tumor necrosis factor production	4/85	92/11525	0.00470518	0.158743	0.145382	CD2/TNFAIP3/PTPRC/TICAM1	4
cowbird	GO:0032680	regulation of tumor necrosis factor production	4/85	92/11525	0.00470518	0.158743	0.145382	CD2/TNFAIP3/PTPRC/TICAM1	4
cowbird	GO:0002253	activation of immune response	7/85	283/11525	0.00482256	0.158743	0.145382	TNFAIP3/IRF7/CFHR5/PTPRC/CR1/TICAM1/IFI35	7
cowbird	GO:1904036	negative regulation of epithelial cell apoptotic process	3/85	48/11525	0.00527232	0.160122	0.146645	RB1/TNFAIP3/FGG	3
cowbird	GO:0071706	tumor necrosis factor superfamily cytokine production	4/85	95/11525	0.00527237	0.160122	0.146645	CD2/TNFAIP3/PTPRC/TICAM1	4
cowbird	GO:1903555	regulation of tumor necrosis factor superfamily cytokine production	4/85	95/11525	0.00527237	0.160122	0.146645	CD2/TNFAIP3/PTPRC/TICAM1	4
cowbird	GO:0045088	regulation of innate immune response	6/85	218/11525	0.00540495	0.160122	0.146645	LAG3/TNFAIP3/IRF7/CR1/TICAM1/IFI35	6
cowbird	GO:0002381	immunoglobulin production involved in immunoglobulin-mediated immune response	3/85	49/11525	0.0055866	0.161466	0.147876	MSH6/RIF1/PTPRC	3
cowbird	GO:0001909	leukocyte mediated cytotoxicity	3/85	50/11525	0.0059119	0.1668	0.152761	LAG3/CD2/PTPRC	3
cowbird	GO:0050727	regulation of inflammatory response	6/85	230/11525	0.00697807	0.173612	0.159	ACE2/RB1/TNFAIP3/PTPRC/DUOXA2/IFI35	6
cowbird	GO:0051146	striated muscle cell differentiation	6/85	230/11525	0.00697807	0.173612	0.159	RB1/TTN/NEB/TANC1/ADAM12/PIEZO1	6
cowbird	GO:1902105	regulation of leukocyte differentiation	6/85	230/11525	0.00697807	0.173612	0.159	RB1/LAG3/CD2/IRF7/PTPRC/CR1	6
cowbird	GO:0051607	defense response to virus	5/85	164/11525	0.00721341	0.173612	0.159	TNFAIP3/IRF7/PTPRC/AKAP1/TICAM1	5
cowbird	GO:0140546	defense response to symbiont	5/85	164/11525	0.00721341	0.173612	0.159	TNFAIP3/IRF7/PTPRC/AKAP1/TICAM1	5
cowbird	GO:0002822	regulation of adaptive immune response based on somatic recombination of immune receptors built from immunoglobulin superfamily domains	4/85	104/11525	0.00724452	0.173612	0.159	TNFAIP3/RIF1/PTPRC/CR1	4
cowbird	GO:0002637	regulation of immunoglobulin production	3/85	54/11525	0.00732541	0.173612	0.159	RIF1/PTPRC/CR1	3
cowbird	GO:0016447	somatic recombination of immunoglobulin gene segments	3/85	54/11525	0.00732541	0.173612	0.159	MSH6/RIF1/PTPRC	3
cowbird	GO:0007596	blood coagulation	5/85	167/11525	0.00777255	0.180147	0.164985	MERTK/FGG/HGFAC/TSPAN8/GGCX	5
cowbird	GO:0050817	coagulation	5/85	169/11525	0.00816169	0.180147	0.164985	MERTK/FGG/HGFAC/TSPAN8/GGCX	5
cowbird	GO:0002694	regulation of leukocyte activation	8/85	392/11525	0.00818912	0.180147	0.164985	LAG3/CD2/MERTK/TNFAIP3/RIF1/PTPRC/CR1/TICAM1	8
cowbird	GO:0051250	negative regulation of lymphocyte activation	4/85	108/11525	0.00825855	0.180147	0.164985	LAG3/MERTK/TNFAIP3/CR1	4
cowbird	GO:0007599	hemostasis	5/85	170/11525	0.00836126	0.180147	0.164985	MERTK/FGG/HGFAC/TSPAN8/GGCX	5
cowbird	GO:0001818	negative regulation of cytokine production	5/85	171/11525	0.00856419	0.181224	0.165971	LAG3/MERTK/TNFAIP3/PTPRC/CR1	5
cowbird	GO:0042692	muscle cell differentiation	7/85	317/11525	0.00880909	0.183136	0.167722	DMD/RB1/TTN/NEB/TANC1/ADAM12/PIEZO1	7
cowbird	GO:0032760	positive regulation of tumor necrosis factor production	3/85	59/11525	0.00935146	0.187108	0.17136	CD2/PTPRC/TICAM1	3
cowbird	GO:0002757	immune response-activating signaling pathway	6/85	246/11525	0.00956189	0.187108	0.17136	TNFAIP3/IRF7/PTPRC/CR1/TICAM1/IFI35	6
cowbird	GO:0045089	positive regulation of innate immune response	5/85	176/11525	0.00963037	0.187108	0.17136	LAG3/TNFAIP3/IRF7/TICAM1/IFI35	5
cowbird	GO:0002700	regulation of production of molecular mediator of immune response	4/85	113/11525	0.0096517	0.187108	0.17136	RIF1/PTPRC/CR1/TICAM1	4
cowbird	GO:0016445	somatic diversification of immunoglobulins	3/85	60/11525	0.00979199	0.187108	0.17136	MSH6/RIF1/PTPRC	3
cowbird	GO:0002221	pattern recognition receptor signaling pathway	4/85	114/11525	0.00994754	0.187108	0.17136	TNFAIP3/IRF7/TICAM1/IFI35	4
long-tailed finch	GO:0099175	regulation of postsynapse organization	4/73	76/10541	0.00186456	0.747803	0.743977	NRCAM/RELN/GRID1/TANC1	4
long-tailed finch	GO:0071482	cellular response to light stimulus	4/73	84/10541	0.00269008	0.747803	0.743977	POLH/RHNO1/TENT2/N4BP1	4
long-tailed finch	GO:0003279	cardiac septum development	4/73	98/10541	0.00468376	0.747803	0.743977	XIRP2/CHD7/NOTCH2/AP2B1	4
long-tailed finch	GO:0048814	regulation of dendrite morphogenesis	3/73	51/10541	0.00523014	0.747803	0.743977	HECW1/PPP3CA/RELN	3
long-tailed finch	GO:0060537	muscle tissue development	7/73	320/10541	0.00652582	0.747803	0.743977	XIRP2/RXRG/MYH11/CHD7/PPP3CA/NOTCH2/VGLL2	7
long-tailed finch	GO:0007411	axon guidance	5/73	176/10541	0.0073757	0.747803	0.743977	NFASC/NOTCH2/PLXNB2/NRCAM/RELN	5
long-tailed finch	GO:0097485	neuron projection guidance	5/73	176/10541	0.0073757	0.747803	0.743977	NFASC/NOTCH2/PLXNB2/NRCAM/RELN	5
long-tailed finch	GO:0034644	cellular response to UV	3/73	63/10541	0.00940133	0.747803	0.743977	POLH/RHNO1/N4BP1	3
woodpecker	GO:1904063	negative regulation of cation transmembrane transport	3/23	71/11347	0.000380054	0.085094	0.0799527	UBR3/KEL/ANK3	3
woodpecker	GO:0034766	negative regulation of monoatomic ion transmembrane transport	3/23	76/11347	0.000464383	0.085094	0.0799527	UBR3/KEL/ANK3	3
woodpecker	GO:0043271	negative regulation of monoatomic ion transport	3/23	95/11347	0.000891669	0.085094	0.0799527	UBR3/KEL/ANK3	3
woodpecker	GO:0034763	negative regulation of transmembrane transport	3/23	97/11347	0.000947303	0.085094	0.0799527	UBR3/KEL/ANK3	3
woodpecker	GO:0001578	microtubule bundle formation	3/23	102/11347	0.00109591	0.085094	0.0799527	STK36/DNAH17/NAV1	3
woodpecker	GO:0046942	carboxylic acid transport	4/23	247/11347	0.00140057	0.085094	0.0799527	KMO/SFXN3/ABCC10/SLC13A2	4
woodpecker	GO:0015849	organic acid transport	4/23	248/11347	0.00142162	0.085094	0.0799527	KMO/SFXN3/ABCC10/SLC13A2	4
woodpecker	GO:0015711	organic anion transport	4/23	298/11347	0.00278223	0.142999	0.134359	KMO/SFXN3/ABCC10/SLC13A2	4
blackbird	GO:0071356	cellular response to tumor necrosis factor	3/26	142/11596	0.00380286	0.397101	0.397101	APOB/NPNT/CACTIN	3
blackbird	GO:0034612	response to tumor necrosis factor	3/26	157/11596	0.00503709	0.397101	0.397101	APOB/NPNT/CACTIN	3

## Sheet: 6 GO enrichment MKT neg DoS
Supplementary Table 6: GO enrichment analysis on the set of genes with negative direction of selection in brood parasites and parental outgroups
group	ID	Description	GeneRatio	BgRatio	pvalue	p.adjust	qvalue	geneID	Count
whydah	GO:0038127	ERBB signaling pathway	3/23	112/11598	0.00134865	0.381871	0.36357	CCDC88A/NRG3/DAB2IP3
whydah	GO:0001764	neuron migration	3/23	158/11598	0.00359629	0.381871	0.36357	SH3RF1/NRG3/DAB2IP3
indigobird	GO:0099003	vesicle-mediated transport in synapse	5/46	191/11826	0.00083539	0.114783	0.111503	BTBD9/ITSN2/SYN3/NLGN3/OPHN1	5
indigobird	GO:1901657	glycosyl compound metabolic process	3/46	55/11826	0.0012543	0.143617	0.139513	NT5E/PGM2/DPYD	3
indigobird	GO:0007585	respiratory gaseous exchange by respiratory system	3/46	63/11826	0.00185782	0.182331	0.177121	CFAP43/NLGN3/FLT4	3
indigobird	GO:0051966	regulation of synaptic transmission, glutamatergic	3/46	69/11826	0.00241162	0.207098	0.20118	NLGN3/OPHN1/ROR2	3
indigobird	GO:0005976	polysaccharide metabolic process	3/46	82/11826	0.0039353	0.300395	0.291811	PYGB/EGF/PGM2	3
indigobird	GO:0090263	positive regulation of canonical Wnt signaling pathway	3/46	90/11826	0.00510869	0.350967	0.340938	GPC5/EGF/TTC21B	3
indigobird	GO:0035249	synaptic transmission, glutamatergic	3/46	98/11826	0.0064726	0.404243	0.392691	NLGN3/OPHN1/ROR2	3
indigobird	GO:0006898	receptor-mediated endocytosis	4/46	204/11826	0.00796843	0.435668	0.423218	ITSN2/EGF/NLGN3/OPHN1	4
indigobird	GO:0001578	microtubule bundle formation	3/46	107/11826	0.00824408	0.435668	0.423218	NCKAP5/CFAP43/NAV1	3
cuckoo finch	GO:0071897	DNA biosynthetic process	4/22	167/11719	0.000238137	0.0881108	0.0877348	TERT/JADE3/SPRTN/POLN	4
cuckoo finch	GO:0007160	cell-matrix adhesion	3/22	193/11719	0.00537744	0.357516	0.35599	DLC1/ITGB5/HRG	3
honeyguide	GO:0098742	cell-cell adhesion via plasma-membrane adhesion molecules	3/28	154/10979	0.00685625	0.493425	0.493425	PLXNB2/PTPRF/CDH22	3
cowbird	GO:0090497	mesenchymal cell migration	3/32	57/11525	0.000513871	0.0406815	0.0379543	SEMA4B/PHACTR4/SEMA6C	3
cowbird	GO:2001020	regulation of response to DNA damage stimulus	5/32	254/11525	0.000618474	0.0419679	0.0391545	ARID1B/SLF2/DHX9/MRGBP/RECQL5	5
cowbird	GO:0048864	stem cell development	3/32	83/11525	0.00153658	0.0663523	0.0619043	SEMA4B/PHACTR4/SEMA6C	3
cowbird	GO:0014033	neural crest cell differentiation	3/32	89/11525	0.00187789	0.0743332	0.0693502	SEMA4B/PHACTR4/SEMA6C	3
cowbird	GO:0001578	microtubule bundle formation	3/32	108/11525	0.00325755	0.119026	0.111047	ODAD2/DNAAF1/SPEF2	3
cowbird	GO:0051054	positive regulation of DNA metabolic process	4/32	241/11525	0.00423334	0.135457	0.126377	ARID1B/SLF2/DHX9/MRGBP	4
cowbird	GO:0006302	double-strand break repair	4/32	250/11525	0.00482159	0.135457	0.126377	ARID1B/SLF2/MRGBP/RECQL5	4
cowbird	GO:0003341	cilium movement	3/32	126/11525	0.00502126	0.135457	0.126377	ODAD2/DNAAF1/SPEF2	3
cowbird	GO:0006310	DNA recombination	4/32	253/11525	0.00502934	0.135457	0.126377	EXO1/SLF2/MRGBP/RECQL5	4
cowbird	GO:0006665	sphingolipid metabolic process	3/32	127/11525	0.00513311	0.135457	0.126377	NSMAF/GALC/TEX2	3
cowbird	GO:0032535	regulation of cellular component size	4/32	287/11525	0.00781944	0.157318	0.146772	SLC12A3/SEMA4B/BAIAP2L1/SEMA6C	4

## Sheet: 7 Genes with sweeps
Supplementary Table 7: genes with evidence of neaby selective sweeps in brood parasites and parental outgroups
whydah	indigobird	cuckoo finch	honeyguide	cowbird	long-tialed finch	woodpecker	blackbird
ACER2	ABCC8	ADGRB3	ACVR2A	FBXO4	ARL14EPL	ADAMTSL3	COL6A3
ADCY8	ADRA1D	ALDH8A1	ADAM33	LOC118696677	BRINP3	AKAP9	FBLN2
AGA	AGMO	ARHGAP8	ADGRB3	LOC118699160	C3H6orf120	CCDC78	FBXO4
ANKRD34B	AKAP12	ATG5	AGL	LOC118699215	CACYBP	CCSER1	LOC129131870
AOC1	AMN1	BLVRA	ANKFY1	LOC118699679	COL8A1	CD93	LOC129131976
ARF1	ANO2	BMP2K	ARHGEF26	LOC118699682	CSF2RB_0	CDH11	LOC129132376
ARF6	AP1S2	BRINP1	ASCC2	LOC118700542	GRM8	CDH13	LOC129132835
ARFGAP3	APPL1	C2H3orf85	ATP6V0D2	LOC118700543	HIPK4	CDH5	LOC129133203
ASB13	ATP5F1A	CADM2	B3GNT2	LOC118700570	KDM4C	CNTNAP2	LOC129133205
ATP8A1	ATP6V0D1	CALM2	BCL11B	LOC129047081	LOC101233140	COL11A1	LOC129133207
ATP8A2	ATXN10	CBLB	BRINP3	MEGF10	LOC101233512	CPNE4	LOC129133671
BASP1	BACH1	CCDC142	C3H12orf40		LOC115490886	FOXF1	LOC129133673
BBX	BNC2	CDH10	CA8		LOC115493564_11	FZD10	LOC129133699
BOD1	BRD1	CDH12	CACNA1C		LOC115493564_8	GASK1A	LOC129133727
C1D	BRINP3	CDH6	CACNA2D4		LOC121468155_15	GRXCR1
C2H3orf85	BTBD3	CDH7	CAMKK1		PCDH15	HSBP1
C6H15orf62	CBFA2T3	CDH9	CC2D1B		SH3GL2	KCTD8
CA10	CCDC80	CENPW	CCSER1		SLC30A5	LOC104303853
CAAP1	CCDC82	CEP170	CD38		SPRY2	LOC104307897
CDC37L1	CDC73	CHSY3	CDKL5		reg_10017	LOC128899432
CDH10	CDH13	CKS2	CDON		reg_10499	NR5A2
CDH11	CEBPG	CMTM4	CEP128		reg_4261	PCDH7
CDH6	CELF4	CNTLN	CHD9		reg_9072	PEX5L
CDH9	CFAP47	COLEC11	CLMP		reg_969	PRKCD
CELF2	CLTCL1	CORO2A	CPS1		reg_9813	PTPRC
CHKB	CNTLN	CRABP1	CRAT		reg_9982	RBMS3
CHRM3	CNTN3	CRISPLD1	CROCC			S1PR1
CLBA1	CNTN5	CSMD1	CSMD3			TAF4B
CNST	CNTNAP4	CSNK1G3	CTTNBP2			TMTC1
CNTN3	COL1A2	CSRNP3	CYYR1			TSPAN5
CNTNAP4	CRIM1	DACH1	DVL1
COG6	DNAJB9	DGKB	DYSF
COLEC11	EPHA6	DIAPH3	EFNB1
CSMD3	EPHA7	DSEL	ELMO1
DACH1	EPYC	DYSF	EYA3
DEPTOR	ERC2	ELAVL2	FGFR2
DGAT2	ETV6	ERGIC3	FLRT2
DNAH5	FERD3L	EYS	GBE1
DOK6	FRMD3	FLRT2	GLIS1
DSC1	FRMPD4	FOXG1	GMEB2
DTD1	FZD8	GABBR2	GRID1
DUSP16	GATA3	GPLD1	GTF2A1
E2F7	GBE1	GRIK2	HEG1
EDIL3	GPBP1	HCN4	HMCN1
EFCAB2	GPM6A	HSD17B4	HPCAL1
ELOVL5	GRPR	IDH1	HTR2C
EMSY	HCN1	IMMP2L	ID2
EN2	HES1	INPP4B	IFITM10
EPB41L2	HMX1	JAM2	IFTAP
EPHA4	IL15	KLF4	IL21
FAM171A1	ING3	LAMA4	IMMP2L
FAT1	IPO11	LINGO2	IMMT
FBXO15	ISX	LOC137462920	INTS6L
FGF20	KANK1	LOC137464248	IPO11
FHAD1	KCNA1	LOC137464472	IQSEC3
FKBP14	KIF2A	LOC137465094	KCNAB1
FLRT2	KPNA5	LOC137465114	KIDINS220
FOXD3	LNX2	LOC137465348	LHX5
FOXN3	LOC128781637	LOC137465350	LOC128967228
FRG1	LOC128781674	LOC137465359	LOC128967332
FRMPD1	LOC128781677	LOC137465560	LOC128968273
GABRG2	LOC128781683	LOC137465561	LOC128968806
GALC	LOC128781851	LOC137465563	LOC128968811
GALNT18	LOC128782081	LOC137465612	LOC128969051
GJC2	LOC128782414	LOC137468551	LOC128969678
GOLGA5	LOC128782439	LOC137468721	LOC128970839
GPC5	LOC128782850	LOC137471568	LOC128972373
GRIK2	LOC128782880	LOC137471772	LOC128972445
GRM8	LOC128783121	LOC137472602	LOC128972446
HDAC2	LOC128783636	LOC137472695	LOC128972490
HDAC8	LOC128786878	LOC137474212	LOC128972640
HIF1A	LOC128786880	LOC137474302	LOC128973459
HS6ST1	LOC128786947	LOC137475624	LOC128973714
IFNAR2	LOC128787555	LOC137476595	LOC128974721
IFNGR2	LOC128787627	LOC137478606	LOC128974830
IL17REL	LOC128787779	LOC137479694	LOC128975305
IL1RAPL1	LOC128788732	LOC137480046	LOC128975312
IL20RB	LOC128790244	LOC137481123	LOC128976146
INVS	LOC128792283	LOC137482843	LOC128976481
IQCJ	LOC128794388	LOC137486713	LOC128977217
ISX	LOC128794951	LRFN2	LOC128978566
JARID2	LOC128798072	LRRFIP2	LRMDA
JMJD4	LOC128798284	LVRN	LRP5
KAT2B	LOC128800321	MARCKS	LRRC4C
KATNBL1	LOC128802514	MAST4	LUZP1
KCNA4	MBNL1	MCFD2	MAPK1
KCNAB1	MDGA2	MGST2	MAPK10
KCNH5	MFSD14B	MMP16	MCRIP2
KCNJ15	MRPL33	NAV2	MOSPD1
KCNMB1	MRPL39	NDST4	MYCN
KCNV1	NAA30	NELL1	MYPN
KCTD8	NCAM2	NKAIN2	NCKAP1
KDM4C	NENF	NLGN4X	NFATC3
KLHL1	NOVA1	NTF3	NFIA
KRAS	NXNL2	NUP50	NOL10
LAMA4	OCA2	OAT	NSUN3
LOC128803181	OSTN	ONECUT1	PBLD
LOC128803184	OTUD1	PCDH10	PCDH10
LOC128803688	PCDH20	PCDH17	PI15
LOC128803952	PCDH7	PCDH18	PIGQ
LOC128803957	PCSK2	PCDH7	PIK3CG
LOC128804968	PDS5B	PCDH9	PLPPR4
LOC128805229	PIK3C3	PDE2A	PLPPR5
LOC128806293	POU3F1	PHLDB2	POT1
LOC128806385	PRKX	PI15	PPP4R3A
LOC128806475	PSMD1	PIGM	PRDM1
LOC128806601	RASEF	PLEKHB2	PRMT8
LOC128806656	RASGRF2	PNPLA4	PROS1
LOC128806864	RMND5A	POLK	PTBP2
LOC128806911	RSPO3	POSTN	PTPRK
LOC128806936	RTN4R	PPDPFL	PTPRQ
LOC128807437	RYR3	PRKX	QKI
LOC128807670	S100Z	PTPRD	RAB11FIP3
LOC128807742	SEMA3C	RAB3C	RALGAPB
LOC128807944	SEMA3E	RASGEF1B	RASSF7
LOC128808112	SLC10A2	RASGRP1	RBL1
LOC128808673	SLC30A1	RBFA	RCSD1
LOC128808746	SLIT2	RFESD	RET
LOC128809012	SLITRK1	RNF38	RGS7BP
LOC128812500	SLITRK5	RORB	RNF144A
LOC128812911	SPRY2	RTTN	ROR1
LOC128812999	ST8SIA4	SHOC1	RPRM
LOC128813000	STIM2	SLC17A6	RPS6KA3
LOC128813139	STXBP6	SLC39A10	SEL1L
LOC128813397	SUCLG1	SLC44A1	SGTB
LOC128814546	SV2C	SLC4A1AP	SH2D4B
LOC128814917	TAFA5	SLITRK1	SLC25A36
LOC128815397	TES	SLITRK5	SLC38A7
LOC128819568	TGFBR2	SLITRK6	SLITRK5
LOC128820592	TMEM167A	SNAP47	SMPD4
LOC128822333	TOGARAM1	SNTG2	SNX16
LOC128822472	TP63	SRFBP1	SSC4D
LRGUK	TUBA8	STIM2	SUCLG1
LRP12	TUSC3	SULT6B1	SV2B
LSAMP	TUT7	SV2C	SYNPO2
MACROD2	UFM1	TK2	TAFA5
MAGI2	UNC93A	TMEM9B	TBL3
MAP4	VPS50	TNPO1	TBX1
MCTP1	ZBBX	TRHDE	TENM2
MDGA2	ZNF469	TSHR	TENM3
MED23	ZNF804B	TSPOAP1	THRB
MEX3C	ZNF827	VSTM2A	TMEM120A
MFSD14B		ZCCHC7	TMEM17
MRPS30		ZNF475	TP73
MRPS6			TRIP13
MSH3			TRPC4
MTAP			TXLNG
MTRR			UNC5B
MYL3			VAC14
MYO5B			VPS54
NAA30			WASHC1
NAV2			WDPCP
NETO1			WDR11
NHLRC1			ZNF503
NLGN4X			ZNF804A
NOL10
NRXN1
NUDT4
NXPH1
OCA2
OGDH
ORC5
P4HA2
PCDH10
PCDH17
PCDH18
PCDH20
PCDH7
PCLO
PCMTD1
PCSK2
PDE9A
PELI1
PIGM
PLCD1
PLPP3
PLXNA4
PNPLA4
PPDPFL
PPP1R3A
PRKX
PTCHD1
RAF1
RASGRF2
RCBTB2
RGS17
RNF121
RTN4R
RUNX1
RYR2
SETBP1
SLC35D1
SLC38A1
SLC5A3
SLC9A3
SLITRK1
SLITRK5
SLITRK6
SNAP47
SNCA
SOCS6
SON
SOX8
SPRED2
SULT6B1
SUPT20H
TASOR2
TBC1D32
TCF4
TEK
TINAG
TNS3
TUSC1
UBE3D
VIPR1
VSTM2A
WDFY2
WNT7B
WWC3
XRCC4
ZNF518B
ZNF804B
LOC128815397
IL20RB
SOX8
RTN4R
CA10
FHAD1
LOC128819568
OGDH
LOC128820592
TCF4
MEX3C
MYO5B
SETBP1
MFSD14B
CNTNAP4
ACER2
KDM4C
CDC37L1
MRPS30
MTAP
TEK
CAAP1
TUSC1
MCTP1
LOC128822472
LOC128822333
EDIL3
EDIL3
XRCC4
RASGRF2
RASGRF2
MSH3
ANKRD34B
FRMPD1

## Sheet: 8 GO enrichment sweeps
Supplementary Table 8: GO enrichment analysis on the set of genes with associated sweeps in brood parasites and parental outgroups
group	ID	Description	GeneRatio	BgRatio	pvalue	p.adjust	qvalue	geneID	Count
whydah	GO:0098742	cell-cell adhesion via plasma-membrane adhesion molecules	13/171	161/11910	5.27391e-07	0.000222461	0.000218796	CDH6/CDH9/CDH10/DSC1/IL1RAPL1/SLITRK1/PCDH20/PCDH17/PCDH18/PCDH10/FAT1/PCDH7/CDH11	13
whydah	GO:0030534	adult behavior	11/171	120/11910	1.16255e-06	0.000330553	0.000325107	NLGN4X/SLITRK5/SLITRK6/SLITRK1/KLHL1/PCDH17/NRXN1/HDAC2/SNCA/EPHA4/GABRG2	11
whydah	GO:0050808	synapse organization	19/171	392/11910	3.46193e-06	0.000843721	0.000829821	ARF1/CDH6/CDH9/CDH10/IL1RAPL1/NLGN4X/SLITRK5/SLITRK6/SLITRK1/PCDH17/NRXN1/SNCA/WNT7B/PCLO/PLXNA4/ARF6/FLRT2/EPHA4/GABRG2	19
whydah	GO:0034329	cell junction assembly	17/171	374/11910	2.66906e-05	0.00569177	0.005598	CDH6/CDH9/CDH10/IL1RAPL1/NLGN4X/SLITRK5/SLITRK6/SLITRK1/PCDH17/NRXN1/SNCA/PCLO/ARF6/FLRT2/CDH11/GABRG2/TEK	17
whydah	GO:0099177	regulation of trans-synaptic signaling	15/171	396/11910	0.000580153	0.0618588	0.0608397	ARF1/NETO1/ADCY8/NLGN4X/PCDH17/NRXN1/GRIK2/SNCA/KRAS/SLC38A1/GRM8/EPHA4/CDH11/MCTP1/RASGRF2	15
whydah	GO:0051960	regulation of nervous system development	14/171	393/11910	0.00158785	0.150493	0.148014	GJC2/IL1RAPL1/SLITRK5/SLITRK6/SLITRK1/NRXN1/HDAC2/KRAS/PLXNA4/HIF1A/FLRT2/EPHA4/SOX8/RTN4R	14
whydah	GO:1901888	regulation of cell junction assembly	9/171	190/11910	0.00167682	0.150561	0.14808	IL1RAPL1/SLITRK5/SLITRK6/SLITRK1/NRXN1/SNCA/ARF6/FLRT2/TEK	9
whydah	GO:0044331	cell-cell adhesion mediated by cadherin	4/171	40/11910	0.00250598	0.203581	0.200227	CDH6/CDH9/CDH10/CDH11	4
whydah	GO:0098586	cellular response to virus	4/171	42/11910	0.00300177	0.213376	0.209861	ARF1/IFNAR2/IFNGR2/HIF1A	4
whydah	GO:0050803	regulation of synapse structure or activity	9/171	210/11910	0.0032984	0.216426	0.21286	IL1RAPL1/SLITRK5/SLITRK6/SLITRK1/NRXN1/SNCA/ARF6/FLRT2/EPHA4	9
whydah	GO:0099565	chemical synaptic transmission, postsynaptic	6/171	105/11910	0.0040028	0.252918	0.248751	NETO1/NLGN4X/NRXN1/GRIK2/SNCA/GABRG2	6
whydah	GO:0006813	potassium ion transport	8/171	192/11910	0.0064973	0.357561	0.35167	SLC9A3/NETO1/KCNV1/KCNJ15/KCNH5/KCNA4/KCNAB1/KCNMB1	8
whydah	GO:0060078	regulation of postsynaptic membrane potential	6/171	117/11910	0.00676138	0.359419	0.353497	NETO1/NLGN4X/NRXN1/GRIK2/SNCA/GABRG2	6
whydah	GO:0034765	regulation of monoatomic ion transmembrane transport	11/171	351/11910	0.012439	0.573538	0.56409	GJC2/NETO1/KCNV1/IFNGR2/KCNJ15/RYR2/SNCA/KCNH5/KCNA4/KCNAB1/KCNMB1	11
whydah	GO:0045913	positive regulation of carbohydrate metabolic process	4/171	65/11910	0.0140847	0.616114	0.605964	KAT2B/DGAT2/SNCA/HIF1A	4
whydah	GO:0032409	regulation of transporter activity	8/171	228/11910	0.0171098	0.622565	0.612308	NETO1/IFNGR2/SLC5A3/RYR2/CHRM3/SNCA/KCNAB1/RASGRF2	8
whydah	GO:0007422	peripheral nervous system development	4/171	71/11910	0.0189263	0.622565	0.612308	SLC5A3/RUNX1/PLXNA4/SOX8	4
whydah	GO:0035383	thioester metabolic process	4/171	72/11910	0.0198215	0.622565	0.612308	DGAT2/ELOVL5/SNCA/OGDH	4
whydah	GO:0071867	response to monoamine	4/171	72/11910	0.0198215	0.622565	0.612308	RYR2/CHRM3/HDAC2/SNCA	4
whydah	GO:0035265	organ growth	6/171	149/11910	0.0204615	0.622565	0.612308	JARID2/BASP1/RUNX1/WWC3/NLGN4X/FGF20	6
whydah	GO:0051703	biological process involved in intraspecies interaction between organisms	3/171	41/11910	0.0208008	0.622565	0.612308	PTCHD1/NLGN4X/NRXN1	3
whydah	GO:0071542	dopaminergic neuron differentiation	3/171	41/11910	0.0208008	0.622565	0.612308	EN2/FGF20/HIF1A	3
whydah	GO:0048483	autonomic nervous system development	3/171	43/11910	0.0235872	0.647572	0.636903	PLXNA4/NAV2/SOX8	3
whydah	GO:0062013	positive regulation of small molecule metabolic process	5/171	114/11910	0.0241315	0.647572	0.636903	KAT2B/DGAT2/ELOVL5/SNCA/HIF1A	5
whydah	GO:0014896	muscle hypertrophy	4/171	77/11910	0.024687	0.647572	0.636903	JARID2/PDE9A/RYR2/HDAC2	4
whydah	GO:0021954	central nervous system neuron development	4/171	77/11910	0.024687	0.647572	0.636903	PLXNA4/EPHA4/CDH11/OGDH	4
whydah	GO:0150076	neuroinflammatory response	3/171	44/11910	0.0250526	0.647572	0.636903	ADCY8/IFNGR2/SNCA	3
whydah	GO:0001892	embryonic placenta development	4/171	78/11910	0.0257391	0.650386	0.639671	WNT7B/E2F7/HIF1A/HS6ST1	4
whydah	GO:0016358	dendrite development	7/171	201/11910	0.0259239	0.650386	0.639671	CSMD3/IL1RAPL1/SLITRK5/KLHL1/HDAC2/ARF6/EPHA4	7
whydah	GO:0043255	regulation of carbohydrate biosynthetic process	4/171	80/11910	0.0279232	0.657333	0.646503	KAT2B/DGAT2/SNCA/PPP1R3A	4
whydah	GO:0097479	synaptic vesicle localization	3/171	46/11910	0.0281274	0.657333	0.646503	PCDH17/SNCA/PCLO	3
whydah	GO:0099643	signal release from synapse	5/171	121/11910	0.0301989	0.678244	0.66707	SNAP47/NRXN1/SNCA/PCLO/MCTP1	5
whydah	GO:0010469	regulation of signaling receptor activity	5/171	122/11910	0.0311372	0.686633	0.675321	NETO1/IFNGR2/HDAC2/HIF1A/RASGRF2	5
whydah	GO:0060038	cardiac muscle cell proliferation	3/171	49/11910	0.033098	0.686856	0.675541	JARID2/RUNX1/FGF20	3
whydah	GO:0043010	camera-type eye development	9/171	309/11910	0.034245	0.686856	0.675541	SLITRK6/ATP8A2/SPRED2/TBC1D32/HDAC2/FAT1/WNT7B/HIF1A/SOX8	9
whydah	GO:0010720	positive regulation of cell development	10/171	359/11910	0.0343071	0.686856	0.675541	GJC2/RUNX1/IL1RAPL1/SLITRK1/HDAC2/KRAS/PLXNA4/HIF1A/EPHA4/SOX8	10
whydah	GO:0007162	negative regulation of cell adhesion	7/171	214/11910	0.0347512	0.686856	0.675541	SOCS6/RUNX1/PELI1/PLXNA4/EPHA4/IL20RB/ACER2	7
whydah	GO:0007632	visual behavior	3/171	50/11910	0.0348499	0.686856	0.675541	NETO1/KRAS/HIF1A	3
whydah	GO:0035773	insulin secretion involved in cellular response to glucose stimulus	3/171	50/11910	0.0348499	0.686856	0.675541	ADCY8/HIF1A/RAF1	3
whydah	GO:0006836	neurotransmitter transport	6/171	170/11910	0.0358872	0.686856	0.675541	SNAP47/NRXN1/SNCA/SLC38A1/PCLO/MCTP1	6
whydah	GO:0051932	synaptic transmission, GABAergic	3/171	51/11910	0.0366489	0.686856	0.675541	KRAS/SLC38A1/GABRG2	3
whydah	GO:0050890	cognition	8/171	265/11910	0.0373813	0.686856	0.675541	NETO1/ADCY8/PTCHD1/NLGN4X/NRXN1/ATP8A1/KRAS/HIF1A	8
whydah	GO:0021545	cranial nerve development	3/171	52/11910	0.0384948	0.686856	0.675541	SLITRK6/PLXNA4/NAV2	3
whydah	GO:0043462	regulation of ATP-dependent activity	3/171	52/11910	0.0384948	0.686856	0.675541	MYL3/RYR2/MSH3	3
whydah	GO:0099504	synaptic vesicle cycle	6/171	174/11910	0.0394912	0.686856	0.675541	SNAP47/NLGN4X/PCDH17/SNCA/PCLO/ARF6	6
whydah	GO:0048638	regulation of developmental growth	8/171	269/11910	0.04026	0.686856	0.675541	JARID2/BASP1/RUNX1/WWC3/ATP8A2/FGF20/PLXNA4/RTN4R	8
whydah	GO:0043523	regulation of neuron apoptotic process	6/171	175/11910	0.0404269	0.686856	0.675541	EN2/GRIK2/SNCA/FGF20/KRAS/HIF1A	6
whydah	GO:0033865	nucleoside bisphosphate metabolic process	4/171	90/11910	0.0404672	0.686856	0.675541	DGAT2/ELOVL5/SNCA/OGDH	4
whydah	GO:0001505	regulation of neurotransmitter levels	6/171	176/11910	0.0413766	0.686856	0.675541	SNAP47/NRXN1/SNCA/SLC38A1/PCLO/MCTP1	6
whydah	GO:0045216	cell-cell junction organization	6/171	176/11910	0.0413766	0.686856	0.675541	CDH6/CDH9/CDH10/NLGN4X/EPHA4/CDH11	6
whydah	GO:0050773	regulation of dendrite development	4/171	91/11910	0.0418717	0.686856	0.675541	CSMD3/IL1RAPL1/ARF6/EPHA4	4
whydah	GO:1903038	negative regulation of leukocyte cell-cell adhesion	4/171	91/11910	0.0418717	0.686856	0.675541	SOCS6/RUNX1/PELI1/IL20RB	4
whydah	GO:0007626	locomotory behavior	6/171	179/11910	0.0443099	0.687226	0.675904	ADCY8/SLITRK6/KLHL1/SNCA/NAV2/EPHA4	6
whydah	GO:1901215	negative regulation of neuron death	6/171	179/11910	0.0443099	0.687226	0.675904	EN2/GRIK2/SNCA/FGF20/KRAS/HIF1A	6
whydah	GO:0043154	negative regulation of cysteine-type endopeptidase activity involved in apoptotic process	3/171	55/11910	0.0443112	0.687226	0.675904	SNCA/RAF1/CAAP1	3
whydah	GO:0044091	membrane biogenesis	3/171	55/11910	0.0443112	0.687226	0.675904	IL1RAPL1/NLGN4X/NRXN1	3
whydah	GO:0001822	kidney development	8/171	279/11910	0.0480948	0.732587	0.720518	BASP1/PRKX/TBC1D32/WNT7B/MAGI2/EPHA4/SOX8/TEK	8
indigobird	GO:0031345	negative regulation of cell projection organization	8/111	167/12127	0.000144971	0.103843	0.100051	SPRY2/EPHA7/SLIT2/SEMA3C/SEMA3E/HES1/RTN4R/KANK1	8
indigobird	GO:0001763	morphogenesis of a branching structure	8/111	184/12127	0.000281417	0.103843	0.100051	TGFBR2/SPRY2/RSPO3/EPHA7/SLIT2/SEMA3C/SEMA3E/TP63	8
indigobird	GO:0060560	developmental growth involved in morphogenesis	8/111	207/12127	0.000617829	0.15644	0.150728	TGFBR2/SPRY2/EPHA7/SLIT2/SEMA3C/SEMA3E/OSTN/RTN4R	8
indigobird	GO:0001667	ameboidal-type cell migration	11/111	379/12127	0.000692432	0.15644	0.150728	TGFBR2/PRKX/AKAP12/SLIT2/SEMA3C/SEMA3E/GATA3/CDH13/APPL1/ATP5F1A/KANK1	11
indigobird	GO:0050919	negative chemotaxis	4/111	45/12127	0.000741925	0.15644	0.150728	EPHA7/SLIT2/SEMA3C/SEMA3E	4
indigobird	GO:0048588	developmental cell growth	7/111	195/12127	0.00207275	0.218103	0.210139	TGFBR2/EPHA7/SLIT2/SEMA3C/SEMA3E/OSTN/RTN4R	7
indigobird	GO:0045926	negative regulation of growth	7/111	197/12127	0.00219579	0.218103	0.210139	TGFBR2/EPHA7/SLIT2/SEMA3C/SEMA3E/OSTN/RTN4R	7
indigobird	GO:0097485	neuron projection guidance	7/111	206/12127	0.00282094	0.221472	0.213385	CNTN5/EPHA6/EPHA7/SLIT2/SEMA3C/SEMA3E/GATA3	7
indigobird	GO:0007409	axonogenesis	10/111	388/12127	0.00291831	0.221472	0.213385	SLITRK5/SLITRK1/CNTN5/EPHA6/EPHA7/SLIT2/SEMA3C/SEMA3E/GATA3/RTN4R	10
indigobird	GO:0051960	regulation of nervous system development	10/111	397/12127	0.00343746	0.230716	0.222292	FERD3L/SLITRK5/SLITRK1/EPHA7/SLIT2/SEMA3C/SEMA3E/ABCC8/HES1/RTN4R	10
indigobird	GO:0030856	regulation of epithelial cell differentiation	5/111	114/12127	0.0039078	0.230716	0.222292	PRKX/SPRY2/GATA3/TP63/HES1	5
indigobird	GO:0032102	negative regulation of response to external stimulus	8/111	289/12127	0.00501074	0.27392	0.263918	NENF/SLIT2/TAFA5/SEMA3C/SEMA3E/GATA3/ABCC8/RTN4R	8
indigobird	GO:0060562	epithelial tube morphogenesis	8/111	294/12127	0.00554585	0.292345	0.281671	TGFBR2/PRKX/SPRY2/EPHA7/SLIT2/SEMA3E/GATA3/HES1	8
indigobird	GO:0048483	autonomic nervous system development	3/111	43/12127	0.00705968	0.325628	0.313738	GATA3/TP63/HES1	3
indigobird	GO:1901343	negative regulation of vasculature development	4/111	88/12127	0.00860178	0.331634	0.319525	SPRY2/TAFA5/SEMA3E/ABCC8	4
indigobird	GO:0043388	positive regulation of DNA binding	3/111	47/12127	0.00903442	0.331634	0.319525	GATA3/HES1/CEBPG	3
indigobird	GO:0099172	presynapse organization	3/111	47/12127	0.00903442	0.331634	0.319525	SLITRK5/SLITRK1/CNTN5	3
indigobird	GO:0030099	myeloid cell differentiation	8/111	329/12127	0.0106072	0.355824	0.342831	TGFBR2/PRKX/IL15/BRD1/GATA3/CDC73/CEBPG/CBFA2T3	8
indigobird	GO:0010975	regulation of neuron projection development	9/111	400/12127	0.0110588	0.357297	0.34425	SLITRK1/EPHA7/SLIT2/SEMA3C/SEMA3E/GATA3/HES1/RTN4R/KANK1	9
indigobird	GO:0051058	negative regulation of small GTPase mediated signal transduction	3/111	51/12127	0.0113015	0.357297	0.34425	SPRY2/SLIT2/KANK1	3
indigobird	GO:0090288	negative regulation of cellular response to growth factor stimulus	4/111	96/12127	0.0115931	0.357297	0.34425	SPRY2/CRIM1/SLIT2/GATA3	4
indigobird	GO:0061005	cell differentiation involved in kidney development	3/111	53/12127	0.012547	0.357297	0.34425	PRKX/GATA3/HES1	3
indigobird	GO:0060485	mesenchyme development	7/111	273/12127	0.0126456	0.357297	0.34425	TGFBR2/SPRY2/SEMA3C/SEMA3E/GATA3/HES1/BNC2	7
indigobird	GO:0003205	cardiac chamber development	5/111	152/12127	0.0128298	0.357297	0.34425	TGFBR2/SLIT2/SEMA3C/GATA3/HES1	5
indigobird	GO:0090130	tissue migration	7/111	276/12127	0.0133633	0.365216	0.35188	TGFBR2/PRKX/SLIT2/GATA3/CDH13/ATP5F1A/KANK1	7
indigobird	GO:0040013	negative regulation of locomotion	7/111	277/12127	0.013609	0.365216	0.35188	SLIT2/TAFA5/SEMA3C/SEMA3E/GATA3/ABCC8/KANK1	7
indigobird	GO:0010721	negative regulation of cell development	6/111	224/12127	0.0168866	0.402313	0.387623	EPHA7/SEMA3C/SEMA3E/ABCC8/HES1/RTN4R	6
indigobird	GO:0098742	cell-cell adhesion via plasma-membrane adhesion molecules	5/111	163/12127	0.0168993	0.402313	0.387623	TGFBR2/SLITRK1/PCDH20/PCDH7/CDH13	5
indigobird	GO:0010827	regulation of glucose transmembrane transport	3/111	61/12127	0.0182911	0.421678	0.40628	OSTN/APPL1/CLTCL1	3
indigobird	GO:0048645	animal organ formation	3/111	61/12127	0.0182911	0.421678	0.40628	TGFBR2/TP63/HES1	3
indigobird	GO:0007416	synapse assembly	5/111	167/12127	0.0185698	0.421678	0.40628	SLITRK5/SLITRK1/CNTN5/EPHA7/GPM6A	5
indigobird	GO:0042102	positive regulation of T cell proliferation	3/111	63/12127	0.0199198	0.439707	0.423651	TGFBR2/IL15/HES1	3
indigobird	GO:0022412	cellular process involved in reproduction in multicellular organism	7/111	300/12127	0.0201961	0.439707	0.423651	CFAP47/OCA2/SLIT2/TUBA8/ETV6/CELF4/TUT7	7
indigobird	GO:0002040	sprouting angiogenesis	4/111	114/12127	0.0205663	0.439707	0.423651	RSPO3/SLIT2/SEMA3E/CDH13	4
indigobird	GO:0007266	Rho protein signal transduction	4/111	117/12127	0.0223827	0.465308	0.448318	COL1A2/CDH13/RTN4R/KANK1	4
indigobird	GO:0048660	regulation of smooth muscle cell proliferation	4/111	123/12127	0.0263021	0.52462	0.505464	TGFBR2/IL15/TAFA5/CDH13	4
indigobird	GO:0003170	heart valve development	3/111	72/12127	0.0282096	0.547861	0.527856	TGFBR2/SLIT2/GATA3	3
indigobird	GO:0021700	developmental maturation	6/111	253/12127	0.0286347	0.548894	0.528852	IL15/BRD1/GATA3/HES1/ATP6V0D1/TUT7	6
indigobird	GO:0048659	smooth muscle cell proliferation	4/111	127/12127	0.0291303	0.551235	0.531107	TGFBR2/IL15/TAFA5/CDH13	4
indigobird	GO:0072073	kidney epithelium development	4/111	130/12127	0.0313657	0.557241	0.536894	EPHA7/SLIT2/GATA3/HES1	4
indigobird	GO:0034764	positive regulation of transmembrane transport	5/111	193/12127	0.032101	0.557241	0.536894	STIM2/KCNA1/ABCC8/APPL1/CLTCL1	5
indigobird	GO:0003151	outflow tract morphogenesis	3/111	76/12127	0.0323973	0.557241	0.536894	TGFBR2/SEMA3C/HES1	3
indigobird	GO:1903034	regulation of response to wounding	4/111	132/12127	0.0329108	0.557241	0.536894	TAFA5/ABCC8/RTN4R/KANK1	4
indigobird	GO:0001558	regulation of cell growth	7/111	334/12127	0.0336006	0.557241	0.536894	EPHA7/SLIT2/SEMA3C/SEMA3E/CDC73/OSTN/RTN4R	7
indigobird	GO:0007568	aging	4/111	137/12127	0.036966	0.575798	0.554773	TGFBR2/IL15/TP63/ATP5F1A	4
indigobird	GO:0097581	lamellipodium organization	3/111	81/12127	0.0380627	0.575798	0.554773	SLIT2/CDH13/KANK1	3
indigobird	GO:0051259	protein complex oligomerization	5/111	203/12127	0.0386075	0.575798	0.554773	COL1A2/KCNA1/RYR3/TP63/HCN1	5
indigobird	GO:0051170	import into nucleus	4/111	139/12127	0.0386653	0.575798	0.554773	UFM1/KPNA5/APPL1/IPO11	4
indigobird	GO:0048534	hematopoietic or lymphoid organ development	3/111	82/12127	0.0392527	0.575798	0.554773	IL15/GATA3/HES1	3
indigobird	GO:0048638	regulation of developmental growth	6/111	273/12127	0.0392981	0.575798	0.554773	TGFBR2/EPHA7/SEMA3C/SEMA3E/OSTN/RTN4R	6
indigobird	GO:0030010	establishment of cell polarity	4/111	141/12127	0.040409	0.575798	0.554773	SPRY2/GATA3/HES1/KANK1	4
indigobird	GO:0048864	stem cell development	3/111	83/12127	0.0404615	0.575798	0.554773	SEMA3C/SEMA3E/HES1	3
indigobird	GO:0051051	negative regulation of transport	7/111	349/12127	0.0410586	0.575798	0.554773	UFM1/SLC30A1/STXBP6/ABCC8/OSTN/HES1/APPL1	7
indigobird	GO:0030900	forebrain development	7/111	351/12127	0.0421285	0.575798	0.554773	SLITRK5/BTBD3/SLIT2/KCNA1/SEMA3E/HES1/RTN4R	7
indigobird	GO:0001701	in utero embryonic development	7/111	352/12127	0.0426702	0.575798	0.554773	TGFBR2/SLC30A1/RSPO3/GATA3/MBNL1/HES1/CELF4	7
indigobird	GO:0009617	response to bacterium	7/111	354/12127	0.0437673	0.575798	0.554773	SLC10A2/CCDC80/SLC30A1/AKAP12/GPM6A/ABCC8/CDC73	7
indigobird	GO:0010717	regulation of epithelial to mesenchymal transition	3/111	86/12127	0.0442001	0.575798	0.554773	TGFBR2/SPRY2/GATA3	3
indigobird	GO:0060993	kidney morphogenesis	3/111	86/12127	0.0442001	0.575798	0.554773	PRKX/GATA3/HES1	3
indigobird	GO:0032412	regulation of monoatomic ion transmembrane transporter activity	5/111	213/12127	0.0458684	0.575798	0.554773	STIM2/KCNA1/ABCC8/HCN1/RASGRF2	5
indigobird	GO:0048880	sensory system development	7/111	359/12127	0.0465896	0.575798	0.554773	TGFBR2/SPRY2/GPM6A/GATA3/HES1/CELF4/HCN1	7
indigobird	GO:0050803	regulation of synapse structure or activity	5/111	214/12127	0.0466364	0.575798	0.554773	FRMPD4/SLITRK5/SLITRK1/EPHA7/GPM6A	5
indigobird	GO:0018958	phenol-containing compound metabolic process	3/111	88/12127	0.0467851	0.575798	0.554773	OCA2/GATA3/APPL1	3
indigobird	GO:0050954	sensory perception of mechanical stimulus	4/111	148/12127	0.0468603	0.575798	0.554773	SPRY2/CNTN5/KCNA1/EPYC	4
indigobird	GO:0035265	organ growth	4/111	149/12127	0.0478261	0.575798	0.554773	TGFBR2/SPRY2/OSTN/BNC2	4
indigobird	GO:0015749	monosaccharide transmembrane transport	3/111	89/12127	0.0481051	0.575798	0.554773	OSTN/APPL1/CLTCL1	3
indigobird	GO:0051402	neuron apoptotic process	5/111	218/12127	0.0497854	0.575798	0.554773	GBE1/EPHA7/SEMA3E/GATA3/TP63	5
cuckoo finch	GO:0098742	cell-cell adhesion via plasma-membrane adhesion molecules	14/107	162/12018	1.5306e-10	1.85011e-07	1.85011e-07	CADM2/CDH10/CDH12/CDH6/CDH7/CDH9/KLF4/PCDH10/PCDH17/PCDH18/PCDH7/PCDH9/PTPRD/SLITRK1	14
cuckoo finch	GO:0034329	cell junction assembly	14/107	374/12018	5.50504e-06	0.00136415	0.00136415	ADGRB3/CDH10/CDH12/CDH6/CDH7/CDH9/FLRT2/NLGN4X/PCDH17/PHLDB2/PTPRD/SLITRK1/SLITRK5/SLITRK6	14
cuckoo finch	GO:0044331	cell-cell adhesion mediated by cadherin	5/107	41/12018	2.9574e-05	0.00458027	0.00458027	CDH10/CDH12/CDH6/CDH7/CDH9	5
cuckoo finch	GO:0050808	synapse organization	12/107	395/12018	0.000199047	0.0246619	0.0246619	ADGRB3/CDH10/CDH6/CDH9/FLRT2/LRFN2/NLGN4X/PCDH17/PTPRD/SLITRK1/SLITRK5/SLITRK6	12
cuckoo finch	GO:0050803	regulation of synapse structure or activity	8/107	210/12018	0.000563971	0.0537507	0.0537507	ADGRB3/FLRT2/LRFN2/PTPRD/SLC17A6/SLITRK1/SLITRK5/SLITRK6	8
cuckoo finch	GO:1901888	regulation of cell junction assembly	7/107	190/12018	0.00152293	0.134779	0.134779	ADGRB3/FLRT2/PHLDB2/PTPRD/SLITRK1/SLITRK5/SLITRK6	7
cuckoo finch	GO:0045216	cell-cell junction organization	6/107	175/12018	0.00470405	0.34947	0.34947	CDH10/CDH12/CDH6/CDH7/CDH9/NLGN4X	6
cuckoo finch	GO:0030534	adult behavior	5/107	123/12018	0.00479499	0.34947	0.34947	NLGN4X/PCDH17/SLITRK1/SLITRK5/SLITRK6	5
cuckoo finch	GO:0051960	regulation of nervous system development	9/107	400/12018	0.00929794	0.523643	0.523643	ADGRB3/BRINP1/FLRT2/FOXG1/JAM2/PTPRD/SLITRK1/SLITRK5/SLITRK6	9
cuckoo finch	GO:0035306	positive regulation of dephosphorylation	3/107	50/12018	0.00993051	0.534952	0.534952	CALM2/GPLD1/SLC39A10	3
cuckoo finch	GO:0007548	sex differentiation	6/107	231/12018	0.0170952	0.763756	0.763756	CSMD1/DACH1/HSD17B4/IDH1/IMMP2L/RNF38	6
cuckoo finch	GO:0050764	regulation of phagocytosis	3/107	62/12018	0.0177496	0.763756	0.763756	ATG5/COLEC11/DYSF	3
cuckoo finch	GO:0006023	aminoglycan biosynthetic process	3/107	63/12018	0.0185189	0.763756	0.763756	CHSY3/DSEL/NDST4	3
cuckoo finch	GO:0010921	regulation of phosphatase activity	3/107	63/12018	0.0185189	0.763756	0.763756	CALM2/GPLD1/SLC39A10	3
cuckoo finch	GO:0044242	cellular lipid catabolic process	5/107	181/12018	0.0227283	0.853345	0.853345	GPLD1/HSD17B4/IDH1/MGST2/PNPLA4	5
cuckoo finch	GO:0099003	vesicle-mediated transport in synapse	5/107	193/12018	0.0289468	0.892056	0.892056	NLGN4X/PCDH17/SLC17A6/SNAP47/SV2C	5
cuckoo finch	GO:0021675	nerve development	3/107	80/12018	0.0344014	0.892056	0.892056	NAV2/NTF3/SLITRK6	3
cuckoo finch	GO:1903510	mucopolysaccharide metabolic process	3/107	81/12018	0.0354997	0.892056	0.892056	CHSY3/DSEL/NDST4	3
cuckoo finch	GO:0045017	glycerolipid biosynthetic process	5/107	204/12018	0.0355133	0.892056	0.892056	DGKB/GPLD1/INPP4B/PIGM/SLC44A1	5
cuckoo finch	GO:0042158	lipoprotein biosynthetic process	3/107	87/12018	0.0424655	0.892056	0.892056	ATG5/GPLD1/PIGM	3
cuckoo finch	GO:0006029	proteoglycan metabolic process	3/107	88/12018	0.0436885	0.892056	0.892056	CHSY3/DSEL/NDST4	3
cuckoo finch	GO:0006638	neutral lipid metabolic process	3/107	88/12018	0.0436885	0.892056	0.892056	DGKB/GPLD1/PNPLA4	3
cuckoo finch	GO:0008654	phospholipid biosynthetic process	5/107	217/12018	0.0443777	0.892056	0.892056	DGKB/IDH1/INPP4B/PIGM/SLC44A1	5
cuckoo finch	GO:0007219	Notch signaling pathway	4/107	154/12018	0.0485845	0.892056	0.892056	BMP2K/CDH6/ONECUT1/POSTN	4
cuckoo finch	GO:0051606	detection of stimulus	4/107	155/12018	0.0495428	0.892056	0.892056	CALM2/DACH1/EYS/GRIK2	4
honeyguide	GO:0007409	axonogenesis	13/125	361/11267	0.000180928	0.144918	0.141219	SLITRK5/CDKL5/FLRT2/LRRC4C/BCL11B/FGFR2/RET/MYPN/UNC5B/B3GNT2/PLPPR4/EFNB1/DVL1	13
honeyguide	GO:0090596	sensory organ morphogenesis	10/125	235/11267	0.000280464	0.144918	0.141219	FGFR2/TENM3/WDPCP/THRB/LRP5/MAPK1/TBX1/PRDM1/DVL1/CDON	10
honeyguide	GO:0031346	positive regulation of cell projection organization	11/125	287/11267	0.000341872	0.144918	0.141219	CDKL5/NCKAP1/ZNF804A/RET/TENM3/KIDINS220/ROR1/PLPPR5/TENM2/DVL1/CROCC	11
honeyguide	GO:0055123	digestive system development	7/125	128/11267	0.000544582	0.161024	0.156914	CPS1/FGFR2/RET/WDPCP/ID2/PRDM1/CLMP	7
honeyguide	GO:0010975	regulation of neuron projection development	12/125	368/11267	0.000784449	0.161024	0.156914	CDKL5/ADGRB3/LRRC4C/ZNF804A/RET/TENM3/KIDINS220/ROR1/PLPPR5/CSMD3/CD38/DVL1	12
honeyguide	GO:0010463	mesenchymal cell proliferation	4/125	41/11267	0.00106443	0.161024	0.156914	FGFR2/MYCN/LRP5/TBX1	4
honeyguide	GO:0097485	neuron projection guidance	8/125	194/11267	0.00141227	0.161024	0.156914	FLRT2/BCL11B/RET/MYPN/UNC5B/B3GNT2/EFNB1/DVL1	8
honeyguide	GO:0043583	ear development	8/125	196/11267	0.00150743	0.161024	0.156914	FGFR2/WDPCP/MYCN/ROR1/PLPPR4/MAPK1/TBX1/DVL1	8
honeyguide	GO:0050803	regulation of synapse structure or activity	8/125	199/11267	0.00165966	0.161024	0.156914	SLITRK5/CDKL5/ADGRB3/CTTNBP2/FLRT2/ZNF804A/GRID1/DVL1	8
honeyguide	GO:0098742	cell-cell adhesion via plasma-membrane adhesion molecules	7/125	156/11267	0.00173775	0.161024	0.156914	LRRC4C/RET/MYPN/TENM3/HMCN1/TENM2/PCDH10	7
honeyguide	GO:0009791	post-embryonic development	5/125	79/11267	0.00181563	0.161024	0.156914	BCL11B/HEG1/FGFR2/VPS54/PRDM1	5
honeyguide	GO:0032526	response to retinoic acid	5/125	81/11267	0.00202814	0.161024	0.156914	FGFR2/RET/BRINP3/CD38/TBX1	5
honeyguide	GO:0045664	regulation of neuron differentiation	7/125	162/11267	0.00215416	0.161024	0.156914	BCL11B/RET/MYCN/ID2/BRINP3/TP73/CDON	7
honeyguide	GO:0061351	neural precursor cell proliferation	6/125	128/11267	0.00298034	0.185085	0.180361	FGFR2/ZNF503/ID2/PTBP2/LHX5/CDON	6
honeyguide	GO:0060541	respiratory system development	7/125	183/11267	0.0042438	0.232808	0.226866	HEG1/FGFR2/WDPCP/MYCN/THRB/MAPK1/TP73	7
honeyguide	GO:0002520	immune system development	6/125	156/11267	0.00777353	0.333951	0.325427	BCL11B/RET/CACNA1C/LRP5/MAPK1/TBX1	6
honeyguide	GO:0050808	synapse organization	10/125	371/11267	0.00820668	0.333951	0.325427	SLITRK5/CDKL5/ADGRB3/CTTNBP2/FLRT2/LRRC4C/ZNF804A/GRID1/NFIA/DVL1	10
honeyguide	GO:0060491	regulation of cell projection assembly	6/125	163/11267	0.00954529	0.333951	0.325427	CDKL5/NCKAP1/WDPCP/PLPPR5/TENM2/CROCC	6
honeyguide	GO:0048736	appendage development	6/125	164/11267	0.00982009	0.333951	0.325427	FGFR2/WDPCP/VPS54/MYCN/CACNA1C/LRP5	6
honeyguide	GO:0030323	respiratory tube development	6/125	165/11267	0.0101005	0.333951	0.325427	HEG1/FGFR2/MYCN/THRB/MAPK1/TP73	6
honeyguide	GO:0048864	stem cell development	4/125	78/11267	0.0109537	0.333951	0.325427	RET/EFNB1/MAPK1/TBX1	4
honeyguide	GO:2000177	regulation of neural precursor cell proliferation	4/125	78/11267	0.0109537	0.333951	0.325427	ID2/PTBP2/LHX5/CDON	4
honeyguide	GO:0048880	sensory system development	9/125	334/11267	0.011978	0.337869	0.329246	BCL11B/RET/TENM3/WDPCP/THRB/CACNA1C/LRP5/PRDM1/CDON	9
honeyguide	GO:0014033	neural crest cell differentiation	4/125	83/11267	0.0135295	0.374566	0.365006	RET/EFNB1/MAPK1/TBX1	4
honeyguide	GO:0051962	positive regulation of nervous system development	7/125	230/11267	0.0140877	0.382479	0.372717	SLITRK5/CDKL5/ADGRB3/FLRT2/ID2/TP73/CDON	7
honeyguide	GO:0007224	smoothened signaling pathway	5/125	129/11267	0.014327	0.382479	0.372717	FGFR2/WDR11/TMEM17/WDPCP/CDON	5
honeyguide	GO:0021872	forebrain generation of neurons	3/125	47/11267	0.0151579	0.390707	0.380735	BCL11B/FGFR2/LHX5	3
honeyguide	GO:0003229	ventricular cardiac muscle tissue development	3/125	49/11267	0.0169504	0.418904	0.408212	HEG1/FGFR2/ID2	3
honeyguide	GO:0016358	dendrite development	6/125	185/11267	0.0169743	0.418904	0.408212	SLITRK5/CDKL5/ADGRB3/KIDINS220/CSMD3/DVL1	6
honeyguide	GO:0000271	polysaccharide biosynthetic process	3/125	52/11267	0.0198524	0.436461	0.425321	GBE1/B3GNT2/AGL	3
honeyguide	GO:0090497	mesenchymal cell migration	3/125	53/11267	0.0208768	0.437135	0.425977	RET/EFNB1/TBX1	3
honeyguide	GO:0042692	muscle cell differentiation	8/125	308/11267	0.0212684	0.437135	0.425977	QKI/ADGRB3/FGFR2/MYPN/ID2/NFATC3/TBX1/CDON	8
honeyguide	GO:0071774	response to fibroblast growth factor	4/125	96/11267	0.0219294	0.437135	0.425977	FLRT2/CPS1/FGFR2/TBX1	4
honeyguide	GO:0034637	cellular carbohydrate biosynthetic process	3/125	54/11267	0.0219298	0.437135	0.425977	GBE1/B3GNT2/AGL	3
honeyguide	GO:0016482	cytosolic transport	5/125	145/11267	0.0225766	0.440064	0.428832	RCSD1/VPS54/SNX16/MAPK1/ANKFY1	5
honeyguide	GO:0048562	embryonic organ morphogenesis	7/125	254/11267	0.0229509	0.440064	0.428832	FGFR2/WDPCP/MYCN/ID2/MAPK1/TBX1/DVL1	7
honeyguide	GO:0099177	regulation of trans-synaptic signaling	9/125	374/11267	0.0232542	0.440064	0.428832	CDKL5/LRRC4C/GRID1/PLPPR4/SV2B/DYSF/CD38/MAPK1/DVL1	9
honeyguide	GO:0042063	gliogenesis	7/125	256/11267	0.0238311	0.441824	0.430547	TRPC4/VPS54/MYCN/ID2/ROR1/MAPK1/TP73	7
honeyguide	GO:0070665	positive regulation of leukocyte proliferation	4/125	99/11267	0.0242338	0.441824	0.430547	EFNB1/CD38/IL21/MAPK1	4
honeyguide	GO:0003205	cardiac chamber development	5/125	149/11267	0.025036	0.45095	0.439441	HEG1/FGFR2/TBX1/PRDM1/LUZP1	5
honeyguide	GO:0042476	odontogenesis	4/125	104/11267	0.0283899	0.499329	0.486584	BCL11B/ACVR2A/FGFR2/TBX1	4
honeyguide	GO:0045598	regulation of fat cell differentiation	4/125	104/11267	0.0283899	0.499329	0.486584	PTPRQ/ID2/HTR2C/LRP5	4
honeyguide	GO:0045685	regulation of glial cell differentiation	3/125	63/11267	0.0326916	0.547268	0.533299	MYCN/ID2/TP73	3
honeyguide	GO:0030879	mammary gland development	4/125	109/11267	0.0329459	0.547268	0.533299	FGFR2/ID2/LRP5/MAPK1	4
honeyguide	GO:0051147	regulation of muscle cell differentiation	4/125	110/11267	0.0339055	0.552976	0.538862	FGFR2/ID2/NFATC3/TBX1	4
honeyguide	GO:0044242	cellular lipid catabolic process	5/125	165/11267	0.0365665	0.567005	0.552533	PIK3CG/CPS1/VPS54/SMPD4/CRAT	5
honeyguide	GO:0006641	triglyceride metabolic process	3/125	66/11267	0.0367889	0.567005	0.552533	PIK3CG/SEL1L/CPS1	3
honeyguide	GO:0007164	establishment of tissue polarity	3/125	66/11267	0.0367889	0.567005	0.552533	WDPCP/ROR1/DVL1	3
honeyguide	GO:0048706	embryonic skeletal system development	4/125	114/11267	0.0379062	0.57702	0.562292	ACVR2A/FGFR2/MYCN/TBX1	4
honeyguide	GO:0006874	intracellular calcium ion homeostasis	6/125	225/11267	0.0391839	0.585799	0.570847	TRPC4/VPS54/CACNA1C/SV2B/HTR2C/IMMT	6
honeyguide	GO:0050673	epithelial cell proliferation	8/125	350/11267	0.0408998	0.59709	0.58185	BCL11B/ACVR2A/FGFR2/MYCN/ID2/MAPK1/TBX1/PTPRK	8
honeyguide	GO:0055017	cardiac muscle tissue growth	3/125	69/11267	0.0411373	0.59709	0.58185	HEG1/FGFR2/TP73	3
honeyguide	GO:0072175	epithelial tube formation	4/125	118/11267	0.0421672	0.606154	0.590682	FGFR2/RET/DVL1/LUZP1	4
honeyguide	GO:0048644	muscle organ morphogenesis	3/125	70/11267	0.042642	0.607141	0.591644	HEG1/FGFR2/TBX1	3
honeyguide	GO:0006661	phosphatidylinositol biosynthetic process	4/125	119/11267	0.0432732	0.610315	0.594738	PIK3CG/HTR2C/VAC14/PIGQ	4
honeyguide	GO:0003151	outflow tract morphogenesis	3/125	72/11267	0.0457333	0.630065	0.613983	FGFR2/TBX1/DVL1	3
honeyguide	GO:0046486	glycerolipid metabolic process	7/125	295/11267	0.0458934	0.630065	0.613983	PIK3CG/SEL1L/CPS1/HTR2C/VAC14/PIGQ/SMPD4	7
honeyguide	GO:0045165	cell fate commitment	6/125	234/11267	0.0459378	0.630065	0.613983	BCL11B/FGFR2/ID2/TBX1/PRDM1/CDON	6
honeyguide	GO:0007204	positive regulation of cytosolic calcium ion concentration	4/125	123/11267	0.0478599	0.65046	0.633858	PIK3CG/CACNA1C/HTR2C/CD38	4
honeyguide	GO:0044264	cellular polysaccharide metabolic process	3/125	74/11267	0.0489329	0.659052	0.64223	GBE1/B3GNT2/AGL	3
long-tailed finch	GO:0007600	sensory perception	3/10	373/10648	0.00425839	0.157598	0.131713	SPRY2/GRM8/PCDH15	3
woodpecker	GO:0044331	cell-cell adhesion mediated by cadherin	3/25	42/11638	9.51203e-05	0.0209008	0.019043	CDH11/CDH5/CDH13	3
woodpecker	GO:0002274	myeloid leukocyte activation	4/25	149/11638	0.000264761	0.0295397	0.026914	PRKCD/CD93/PTPRC/FOXF1	4
woodpecker	GO:0098742	cell-cell adhesion via plasma-membrane adhesion molecules	4/25	161/11638	0.00035579	0.03037	0.0276705	PCDH7/CDH11/CDH5/CDH13	4
woodpecker	GO:0031348	negative regulation of defense response	4/25	163/11638	0.000372894	0.03037	0.0276705	PRKCD/PTPRC/CDH5/FOXF1	4
woodpecker	GO:0045216	cell-cell junction organization	4/25	169/11638	0.000427747	0.03037	0.0276705	CNTNAP2/CDH11/CDH5/CDH13	4
woodpecker	GO:0019932	second-messenger-mediated signaling	4/25	219/11638	0.00113123	0.0736242	0.0670799	NR5A2/PTPRC/PEX5L/CDH13	4
woodpecker	GO:0035303	regulation of dephosphorylation	3/25	100/11638	0.00123413	0.0741429	0.0675525	PRKCD/PTPRC/CDH5	3
woodpecker	GO:0050727	regulation of inflammatory response	4/25	233/11638	0.00142272	0.0793673	0.0723126	PRKCD/PTPRC/CDH5/FOXF1	4
woodpecker	GO:0032102	negative regulation of response to external stimulus	4/25	281/11638	0.00282013	0.112131	0.102164	PRKCD/PTPRC/CDH5/FOXF1	4
woodpecker	GO:1902903	regulation of supramolecular fiber organization	4/25	294/11638	0.00331949	0.112131	0.102164	PRKCD/AKAP9/S1PR1/CDH5	4
woodpecker	GO:0050866	negative regulation of cell activation	3/25	142/11638	0.00336	0.112131	0.102164	PRKCD/PTPRC/FOXF1	3
woodpecker	GO:0032970	regulation of actin filament-based process	4/25	307/11638	0.0038765	0.112131	0.102164	PRKCD/AKAP9/S1PR1/FZD10	4
woodpecker	GO:0006909	phagocytosis	3/25	155/11638	0.00429803	0.119884	0.109228	PRKCD/CD93/PTPRC	3
woodpecker	GO:0034329	cell junction assembly	3/25	364/11638	0.00707598	0.162539	0.148092	CNTNAP2/CDH11/CDH5/CDH13	4
woodpecker	GO:0007162	negative regulation of cell adhesion	3/25	208/11638	0.00968591	0.167084	0.152232	PRKCD/PTPRC/CDH13	3
woodpecker	GO:0051345	positive regulation of hydrolase activity	4/25	400/11638	0.00980917	0.167084	0.152232	PRKCD/S1PR1/PTPRC/FZD10	4
woodpecker	GO:0051258	protein polymerization	3/25	214/11638	0.0104639	0.169044	0.154018	PRKCD/AKAP9/CDH5	3
woodpecker	GO:0003007	heart morphogenesis	3/25	231/11638	0.0128628	0.189545	0.172697	S1PR1/COL11A1/FOXF1	3
woodpecker	GO:0021700	developmental maturation	3/25	242/11638	0.0145706	0.210734	0.192002	CNTNAP2/S1PR1/CDH5	3
woodpecker	GO:0045229	external encapsulating structure organization	3/25	251/11638	0.0160599	0.214848	0.195751	COL11A1/ADAMTSL3/FOXF1	3
woodpecker	GO:0043062	extracellular structure organization	3/25	252/11638	0.0162305	0.214848	0.195751	COL11A1/ADAMTSL3/FOXF1	3
woodpecker	GO:0090130	tissue migration	3/25	267/11638	0.0189143	0.233099	0.212379	CDH5/CDH13/FOXF1	3
woodpecker	GO:0071900	regulation of protein serine/threonine kinase activity	3/25	268/11638	0.0191016	0.233099	0.212379	PRKCD/PTPRC/FZD10	3
woodpecker	GO:0016311	dephosphorylation	3/25	278/11638	0.0210313	0.235778	0.214821	PRKCD/PTPRC/CDH5	3
woodpecker	GO:0010639	negative regulation of organelle organization	3/25	294/11638	0.0243368	0.250741	0.228453	PRKCD/S1PR1/CDH5	3
woodpecker	GO:0031589	cell-substrate adhesion	3/25	296/11638	0.0247689	0.250741	0.228453	CDH11/CDH13/FOXF1	3
woodpecker	GO:0043254	regulation of protein-containing complex assembly	3/25	312/11638	0.0283767	0.260732	0.237556	PRKCD/AKAP9/CDH5	3
woodpecker	GO:0033674	positive regulation of kinase activity	3/25	324/11638	0.0312589	0.280612	0.255669	PRKCD/PTPRC/FZD10	3
woodpecker	GO:0045785	positive regulation of cell adhesion	3/25	342/11638	0.0358644	0.301184	0.274413	PTPRC/CDH13/FOXF1	3
woodpecker	GO:0001503	ossification	3/25	347/11638	0.0372036	0.304264	0.277219	S1PR1/COL11A1/CDH11	3
woodpecker	GO:0002252	immune effector process	3/25	354/11638	0.0391219	0.310926	0.283289	PRKCD/PTPRC/FOXF1	3
